# Supplementary material for: Helping people discontinue long-term antidepressants: views of health professionals in UK primary care
Source: PubMed Central journal article supplement — BMJ Open. 2019 Jul 4;9(7):e027837. doi: 10.1136/bmjopen-2018-027837 (PMC6615882; doi:10.1136/bmjopen-2018-027837), 2019-07-04
Supplement: bmjopen-2018-027837.draft_revisions.pdf [file bmjopen-2018-027837.draft_revisions.pdf]

# BMJ Open

BMJ Open is committed to open peer review. As part of this commitment we make the peer review history of every article we publish publicly available.

When an article is published we post the peer reviewers' comments and the authors' responses online. We also post the versions of the paper that were used during peer review. These are the versions that the peer review comments apply to.

The versions of the paper that follow are the versions that were submitted during the peer review process. They are not the versions of record or the final published versions. They should not be cited or distributed as the published version of this manuscript.

BMJ Open is an open access journal and the full, final, typeset and author-corrected version of record of the manuscript is available on our site with no access controls, subscription charges or pay-per-view fees (<http://bmjopen.bmj.com>).

If you have any questions on BMJ Open's open peer review process please email [info.bmjopen@bmj.com](mailto:info.bmjopen@bmj.com)

# BMJ Open

## Helping people discontinue long-term antidepressants: Views of health professionals in UK primary care

|                               |                                                                                                                                                                                                                                                                                                                                                                                                                                                                                                                                                                                                                                                                                                                                                          |
|-------------------------------|----------------------------------------------------------------------------------------------------------------------------------------------------------------------------------------------------------------------------------------------------------------------------------------------------------------------------------------------------------------------------------------------------------------------------------------------------------------------------------------------------------------------------------------------------------------------------------------------------------------------------------------------------------------------------------------------------------------------------------------------------------|
| Journal:                      | <i>BMJ Open</i>                                                                                                                                                                                                                                                                                                                                                                                                                                                                                                                                                                                                                                                                                                                                          |
| Manuscript ID                 | bmjopen-2018-027837                                                                                                                                                                                                                                                                                                                                                                                                                                                                                                                                                                                                                                                                                                                                      |
| Article Type:                 | Research                                                                                                                                                                                                                                                                                                                                                                                                                                                                                                                                                                                                                                                                                                                                                 |
| Date Submitted by the Author: | 12-Nov-2018                                                                                                                                                                                                                                                                                                                                                                                                                                                                                                                                                                                                                                                                                                                                              |
| Complete List of Authors:     | Bowers, Hannah; University of Southampton Faculty of Medicine, Primary Care and Population Sciences<br>Williams, Samantha; University of Southampton, Primary Care & Population Sciences<br>Geraghty, Adam; University of Southampton, Primary Care and Population Sciences<br>Maud, Emma; University of Southampton Faculty of Medicine, Primary Care and Population Sciences<br>O'brien, Wendy; University of Southampton Faculty of Medicine, Primary Care and Population Sciences<br>Leydon, Geraldine; University of Southampton, Faculty of Medicine<br>May, Carl; London School of Hygiene and Tropical Medicine Faculty of Epidemiology and Population Health<br>Kendrick, Tony; University of Southampton, Primary Care and Population Sciences |
| Keywords:                     | antidepressants, Depression & mood disorders < PSYCHIATRY, PRIMARY CARE, health professional                                                                                                                                                                                                                                                                                                                                                                                                                                                                                                                                                                                                                                                             |
|                               |                                                                                                                                                                                                                                                                                                                                                                                                                                                                                                                                                                                                                                                                                                                                                          |

SCHOLARONE™  
Manuscripts

1  
2  
3  
4 1 Helping people discontinue long-term antidepressants: Views of health  
5  
6  
7 2 professionals in UK primary care  
8  
9  
10 3

11  
12 4 Hannah M Bowers<sup>1\*</sup>, Samantha Williams<sup>1</sup>, Adam W A Geraghty<sup>1</sup>, Emma Maund<sup>1</sup>, Wendy  
13  
14  
15 5 O'Brien<sup>1</sup>, Geraldine Leydon<sup>1</sup>, Carl May<sup>2</sup>, Tony Kendrick<sup>1</sup>  
16  
17  
18 6

19  
20 7 <sup>1</sup> Primary Care and Population Sciences Academic Unit, Faculty of Medicine, University of  
21  
22  
23 8 Southampton, Aldermoor Health Centre, Aldermoor Close, Southampton, SO16 5ST, UK  
24

25 9 <sup>2</sup> Faculty of Public health and Policy, London School of Hygiene and Tropical Medicine, 15-17  
26  
27  
28 10 Tavistock Place, London, WC1H 9SH  
29

30 11  
31  
32 12 Corresponding author: Hannah Bowers  
33

34 13 Telephone: (023) 8059 1743  
35

36 14 Email: H.M.Bowers@soton.ac.uk  
37

38 15 Address: Primary Care and Population Sciences Academic Unit, Faculty of Medicine,  
39  
40  
41 16 University of Southampton, Aldermoor Health Centre, Aldermoor Close, Southampton, SO16  
42  
43 17 5ST, UK  
44  
45  
46 18  
47  
48 19  
49  
50  
51  
52  
53  
54  
55  
56  
57  
58  
59  
60

1  
2  
3  
4 1 **Abstract** (300 words max)  
5

6 2 Objective: The aim of this paper was to identify, characterise and explain clinician factors  
7  
8 3 which shape decision making around antidepressant discontinuation in UK primary care.  
9

10 4 Design: Focus groups and interviews were conducted and analysed using thematic analysis.  
11  
12

13 5 Participants: GPs, GP Assistants, nurses, Community Mental Health Team Workers and  
14  
15 6 psychotherapists took part in focus groups and interviews.  
16

17 7 Setting: Participants were recruited from seven primary care regions and two NHS Trusts  
18  
19 8 providing community mental health services in the South of England.  
20  
21

22 9 Results: Participants highlighted a number of barriers and enablers to discussing  
23  
24 10 discontinuation with patients. They held a range of views around responsibility, with some  
25  
26 11 suggesting it was the responsibility of the health professional to broach the subject, and  
27  
28 12 others suggesting responsibility rested with the patients. Health professionals were  
29  
30 13 concerned about destabilising the current situation, discussed how continuity and knowing  
31  
32 14 the patient facilitated discontinuation talks, and discussed how confidence in their  
33  
34 15 professional skills and knowledge affected whether they elected to raise discontinuation in  
35  
36 16 consultations.  
37  
38  
39  
40  
41

42 17 Conclusions: Findings indicate a need to consider support for health professionals in the  
43  
44 18 management of antidepressant medication and discussions of discontinuation in particular.  
45  
46 19 They may also benefit from support around their fears of patient relapse and awareness of  
47  
48 20 when and how to initiate discussions about discontinuation with their patients.  
49  
50  
51

52 21  
53  
54 22 **Keywords** antidepressants; depression; primary care; focus group; health professional  
55  
56  
57 23  
58  
59  
60

1  
2  
3  
4 1 **Strengths and limitations of this study**

- 5  
6 2 • This study explored views of primary care health professionals in relation to  
7  
8 3 antidepressant withdrawal  
9  
10 4 • Focus groups allowed participants to exchange views on the topic thereby providing  
11  
12 topic rich data  
13  
14 5  
15 6 • Unlike previous research, this study included perspectives of non-GP health  
16  
17 professionals  
18  
19 7  
20 8 • The use of focus groups facilitated group discussion however it is possible that the  
21  
22 group setting may reduce openness  
23  
24  
25  
26  
27  
28  
29  
30  
31  
32  
33  
34  
35  
36  
37  
38  
39  
40  
41  
42  
43  
44  
45  
46  
47  
48  
49  
50  
51  
52  
53  
54  
55  
56  
57  
58  
59  
60

## 1 Introduction

2 Antidepressant prescriptions have risen steadily since the introduction of selective serotonin  
3 reuptake inhibitors (SSRIs) in the late 1980s. This rise is primarily due to general  
4 practitioners (GPs) continuing to prescribe for longer [1,2], with the average length of  
5 treatment now at more than two years [3,4]. Around 10% of adults are currently taking  
6 antidepressants (predominantly for depression, but also for anxiety and chronic pain) [5], yet  
7 the prevalence of major depression is only 3% [6]. Some people need long-term  
8 antidepressants to prevent relapse, but surveys suggest 30-50% have no guideline-based  
9 indication for long-term use (e.g. according to the NICE Depression Guideline (2009)) [7-9].  
10 This may be due to many patients on long-term treatment being given repeat prescriptions  
11 and being reviewed infrequently [10,11].

12  
13 The side effects of antidepressants include weight gain, sexual dysfunction, sleep  
14 disturbance, and gastrointestinal bleeding, which increase with longer-term use [12]. SSRI  
15 use for depression in older patients is associated with increased risk of falls, fractures,  
16 seizures, stroke, and hyponatraemia [13]. In addition, long-term treatment may lead to  
17 emotional blunting [14], impaired self-confidence and increased dependence on health  
18 services. Antidepressants constitute a substantial proportion of the NHS drug budget: 2.5%  
19 in 2010 [15] and the costs of unnecessary treatment include appointments for medical or  
20 nursing reviews. The cost of GP consultations for depression exceeded £30m in 2008, in  
21 addition to the cost of the 64.7 million antidepressant prescriptions of around £266m  
22 (HSCIC, 2015; HSCIC, 2017; Independent Research Service of the House of Commons  
23 Library, 2008). Attempts to discontinue in the 30-50% of patients taking antidepressants

1  
2  
3  
4 1 without guidance-based indication may then result in reduced NHS costs while

5  
6 2 simultaneously alleviating the side effects associated with antidepressant use.

7  
8 3

9  
10 4 Stopping antidepressants is challenging for doctors. Prompting GPs to review patients who

11  
12 5 were eligible for withdrawal was tested in a trial in the Netherlands and found to be

13  
14 6 ineffective, with only 6% of patients discontinuing antidepressants in the intervention group,

15  
16 7 and 8% in the control group [19]. Similarly, an uncontrolled trial of pharmacist-prompted GP

17  
18 8 review of long-term users in Scotland resulted in only 7% of people stopping [3]. Prompting

19  
20 9 alone is therefore insufficient in supporting patients to discontinue antidepressants, which

21  
22 10 indicates there are other factors preventing GPs from attempting to withdraw patients from

23  
24 11 antidepressants.

25  
26 12

27  
28 13 While GPs play a key role in prescribing and discontinuing antidepressants, other health

29  
30 14 professionals also advise patients about antidepressants in primary care. Previous research

31  
32 15 with health professionals looking at antidepressant discontinuation has reported that the

33  
34 16 main barrier is a lack of awareness of guidance on best practice in discontinuation [20].

35  
36 17 Other barriers include a lack of awareness of patient expectations that health professionals

37  
38 18 should initiate discussions of discontinuation, the availability of alternative treatments, time

39  
40 19 constraints, and GP and patient fear of destabilising a currently well patient [20,21]. A

41  
42 20 qualitative meta-synthesis of patient and practitioner perspectives on antidepressant

43  
44 21 discontinuation highlighted a lack of consistent support and guidance for GPs and the impact

45  
46 22 of time constraints on discontinuation [22]. However there is only limited evidence on the

47  
48 23 health professional perspective of antidepressant discontinuation (in particular practice

49  
50 24 nurses and community mental health workers) and previous studies were completed outside

1  
2  
3 1 of the UK, and one within a nursing home. Insights into UK primary care health professional  
4  
5  
6 2 perspectives are therefore needed to determine barriers and facilitators to supporting  
7  
8 3 patients in discontinuing antidepressants in the UK.  
9

10  
11 4  
12  
13 5 The REDUCE programme aims to identify ways of helping patients taking long-term  
14  
15 6 antidepressants withdraw from treatment when appropriate [23]. Normalisation Process  
16  
17 7 Theory (NPT) identifies, characterises and explains key mechanisms that motivate and  
18  
19 8 shape implementation processes [24]. It focuses attention on the work that participants in  
20  
21 9 these processes do when they seek to routinely incorporate components of complex  
22  
23 10 interventions in their everyday lives. This paper reports the findings from the health  
24  
25 11 professional (HP) focus groups as part of the REDUCE programme. Our aims were to  
26  
27 12 identify, characterise and explain clinician factors which shape decision making around  
28  
29 13 antidepressant discontinuation in UK primary care.  
30  
31  
32  
33  
34  
35  
36  
37  
38  
39  
40  
41  
42  
43

## 44 15 **Methods**

### 45 17 *Participants*

46 18 HPs including GPs, GP Assistants, nurses, Community Mental Health Team Workers and  
47  
48 19 psychotherapists were recruited from seven primary care regions and two NHS Trusts  
49  
50 20 providing community mental health services in the South of England between January and  
51  
52 21 May 2017. GP practices and individuals were recruited via email and were invited to return a  
53  
54 22 reply slip. HPs who expressed an interest were invited to take part in one of four focus  
55  
56 23 groups taking place in the South of England between March and May 2017. Twenty-one  
57  
58 24 sites returned a reply slip, with thirty-eight participants taking part in either a focus group or  
59  
60



1  
2  
3  
4 1 interview (22 females and 12 males). The reported range of years since qualified was 2-35.  
5  
6 2 Focus groups were chosen over individual interviews to allow participants to exchange views  
7  
8 3 on the topic thereby providing topic rich data as well as an insight into group and individual  
9  
10 4 views, including important areas of consensus and disagreement. Individual interviews were  
11  
12 5 offered to psychotherapists as this group was underrepresented in the focus group sample  
13  
14 6 (n=2) and to one GP in order to pilot the topic guide. Every participant was taken through the  
15  
16 7 informed consent process and given the opportunity to read the information leaflet and ask  
17  
18 8 questions prior to data collection. Each focus group had between seven and ten participants  
19  
20 9 and the length of each ranged between 43 and 59 minutes.  
21  
22  
23  
24  
25  
26  
27  
28  
29

### 30 11 *Patient and Public Involvement*

31  
32 12 Patient and public members of the REDUCE team were involved in discussions about the  
33  
34 13 design and recruitment for this study, and were invited to comment on initial drafts of the  
35  
36 14 topic guide.  
37  
38  
39  
40  
41

### 42 16 *Ethical Approval*

43  
44 17 Ethical approval to conduct the study was granted by the South Central Berkshire B  
45  
46 18 Research Ethics Committee and the Health Research Authority (Reference Number  
47  
48 19 16/SC/0472).  
49  
50  
51  
52  
53

### 54 22 *Focus Groups*

55  
56 23 A topic guide was developed based around the main aims of the study (supplement 1).  
57  
58 24 Topics explored long-term antidepressant use and knowing when discontinuation may be  
59  
60

1  
2  
3 1 appropriate, negotiating the decision to discontinue antidepressants with patients, HP roles  
4  
5  
6 2 in terms of supporting and negotiating appropriateness of discontinuation, how to optimise  
7  
8 3 discussions around possible discontinuation, and ways to optimise implementation of a  
9  
10 4 discontinuation intervention in routine practice. Normalisation Process Theory [24] informed  
11  
12  
13 5 the topic guide in order to ensure the questions addressed the processes involved in  
14  
15 6 antidepressant discontinuation with regards to the four NPT constructs (Coherence,  
16  
17 7 Cognitive Participation, Collective Action, and Reflexive Monitoring). For example, to  
18  
19 8 address the NPT construct of cognitive participation (i.e. who does the work), participants  
20  
21 9 were asked 'What do you see as your role in negotiating medication discontinuation'. The  
22  
23 10 topic guide was not limited to discussing depressive disorders and therefore was open to  
24  
25 11 discussion about antidepressant use in other conditions (e.g. anxiety and chronic pain).  
26  
27  
28  
29  
30 12  
31  
32 13 The focus groups were conducted face-to-face and were organised pragmatically across  
33  
34 14 different geographical locations in the South of England. Two groups were held with mixed  
35  
36 15 primary care HPs and two groups with GPs only (see table 1). Groups were held in GP  
37  
38 16 practices and a community-based health centre. In order to acknowledge potential "group"  
39  
40 17 effects (i.e. participants being unaware of the degree to which other group members' views  
41  
42 18 represent their own experience), free participation was encouraged by the facilitators by  
43  
44 19 avoiding censorship and conformity [25]. Focus groups were facilitated and co-facilitated by  
45  
46 20 two experienced female qualitative researchers (SW and WOB) and were audio recorded. A  
47  
48 21 debriefing was conducted by the two facilitators following each focus group to identify issues  
49  
50 22 that may affect analysis (e.g. domineering or quiet members), to discuss what went well,  
51  
52 23 what did not and suggest possible modifications to the topic guide.  
53  
54  
55  
56  
57  
58  
59  
60

1 Table 1. Number of health professionals attending each focus group or interview.

|               | Focus<br>Group<br>1 | Focus<br>Group 2 | Focus<br>Group 3 | Focus<br>Group 4 | Interview | Total |
|---------------|---------------------|------------------|------------------|------------------|-----------|-------|
| GP            | 7                   | 2                | 2                | 9                | 1         | 21    |
| GPA           | 0                   | 4                | 0                | 0                | 0         | 4     |
| NP            | 0                   | 2                | 5                | 0                | 0         | 7     |
| CMHW<br>or PT | 0                   | 2                | 2                | 0                | 2         | 6     |
| <b>Totals</b> | 7                   | 10               | 9                | 8                | 3         | 38    |

2 *Notes.* GP: General Practitioner; GPA General Practitioner Assistant; NP: Nurse Practitioner; CMHW:  
3 Community Mental Health team Worker; PT: Psychological Therapist.

#### 5 *Interviews*

6 Three semi-structured face-to-face qualitative interviews were conducted with two  
7 psychotherapists and a GP. The same topic guide that had been developed for the focus  
8 groups was utilised in the interviews to ensure consistency. As with the focus groups, the  
9 interviewer explored additional topics when brought up by the interviewee. Interviews were  
10 carried out by an experienced qualitative researcher (SW) and were audio recorded.

#### 12 *Analysis*

13 All focus groups and interviews were transcribed verbatim. Transcripts were read and re-  
14 read by SW both during and after the data collection period. While the focus groups and  
15 interviews were taking place, the REDUCE Study team met regularly to discuss topics raised  
16 by participants and the topic guide was refined as the focus groups and interviews  
17 progressed through debriefing with the two facilitators and through meetings with the wider

1  
2  
3  
4 1 research team. These discussions resulted in only minor changes regarding the order of  
5  
6 2 questions in the schedule and the wording of questions.  
7

8  
9 3

10 4 A thematic analysis approach was used to analyse data drawing on methods of constant  
11  
12  
13 5 comparison [26–29]. SW independently coded the seven transcripts using Nvivo, and a  
14  
15 6 secondary analysis team (SW, AG, HB, GL and TK) met to agree a preliminary coding  
16  
17 7 frame, which was then agreed by the whole team. HB independently coded two transcripts  
18  
19 8 using the coding frame; discrepancies were minor and changes were made following  
20  
21 9 discussion with the team. Codes were grouped into themes by SW and HB, where both  
22  
23 10 within and between-participant variation was considered. Theme labelling and interpretation  
24  
25 11 was continually discussed in regular team meetings. Data were assessed for saturation by  
26  
27 12 SW individually and across-group (Onwuegbuzie et al., 2009). Data saturation was  
28  
29 13 determined when no new codes were emerging.  
30  
31  
32  
33  
34  
35  
36  
37  
38  
39  
40  
41  
42  
43  
44  
45  
46  
47

## 48 15 **Results**

49 16 Five themes were identified from the data analysis regarding barriers and facilitators to  
50  
51 17 discussing antidepressant discontinuation with patients (see figure 1).  
52  
53  
54  
55  
56  
57  
58  
59  
60

19 [insert figure 1 about here]

20

21 Theme 1: Who is responsible for broaching the subject of discontinuation?

1  
2  
3  
4 1 There were differing views about who is responsible for raising the topic of discontinuation in  
5  
6 2 a consultation. A small number of HPs suggested it was the patient's responsibility to broach  
7  
8 3 the subject and that this expectation should be set when antidepressants are first prescribed.  
9

10  
11 4  
12  
13  
14 5 *I tend to say to people, 'Look, when you start it, I'd like you to continue for at least six*  
15  
16 6 *months after you've felt well', and then right at the outset, I put the responsibility over*  
17  
18 7 *to them and say, 'Look, one of the things about depression is that you lose control*  
19  
20 8 *and the worst thing is to come to see the doctor and the doctor takes over control.*  
21  
22 9 *So, as far as I'm concerned, you're in control of these tablets and it's your choice as*  
23  
24 10 *to when you want to stop it but usually the recommendation is six months after you've*  
25  
26 11 *been well'. I think most people - I haven't audited it - at that stage, do come back*  
27  
28 12 *round about six months-ish and are keen to stop and usually that works okay.*

29  
30  
31  
32  
33 13 [GP/09/0002].  
34  
35  
36  
37  
38  
39  
40  
41  
42  
43  
44  
45  
46  
47  
48  
49

50  
51  
52  
53  
54  
55  
56  
57  
58  
59  
60  
15 One GP argued in favour of telling the patient at the initial prescription that they have the  
16 responsibility to initiate stopping and the choice to discontinue is up to them. By setting the  
17 expectation that it is the patient's responsibility, it opens up the possibility of them taking  
18 control by broaching the subject with their GP when they are ready.

19 However HPs highlighted there are problems with relying on the patient to broach the issue.

20 Two nurses and a psychotherapist acknowledged that many patients may not instigate these  
21 conversations. One psychotherapist explained that patients may be reluctant to broach the  
22 subject due to their expectation of how the doctor may respond, or because they perceive  
23 the doctor to be more knowledgeable about the situation.

1  
2  
3  
4 1  
5  
6  
7 2 *Even if they do get an appointment, I've met a lot of people who are really hesitant*  
8  
9 3 *about asking about changes in medication, because of the response from the doctor*  
10  
11 4 *perhaps or their perceived response... I think there's often a worry, you know, the*  
12  
13  
14 5 *kind of, 'Doctor knows best, and they put me on this medication. So I don't want to*  
15  
16 6 *offend or I don't want to question'. [PT/14/0002].*  
17  
18  
19 7

20  
21  
22 8 One GP suggested that when patients do not raise the idea of discontinuation, practitioners  
23  
24 9 may assume that the patient wants to continue treatment. This mutual assumption that the  
25  
26  
27 10 HP wants the patient to continue, and that the patient him/herself wants to continue, may  
28  
29  
30 11 result in a form of collusion to maintain the status quo.

31  
32 12 HPs appeared to be aware that relying on the patient to initiate discussion may be  
33  
34  
35 13 problematic, as evidenced through the way some HPs discussed the problem. It may  
36  
37 14 therefore follow that the responsibility to initiate discussions around discontinuation should  
38  
39  
40 15 lie with the GP.

41  
42  
43 16  
44  
45  
46 17 *I think I'm guilty of this, it's very easy just to keep kicking the can down the road and*  
47  
48 18 *the patient keeps taking the medication because they feel they should and you keep*  
49  
50 19 *prescribing it because you assume they still want it and there's this kind of collusion*  
51  
52  
53 20 *that unless you actively intervene and say, 'Come and talk to me', or whatever.*  
54  
55 21 [GP/11/0001].  
56  
57  
58 22  
59  
60

1  
2  
3  
4 1 Some participants (including GPs) thought that it was the GP's responsibility to broach the  
5  
6 2 subject with patients; arguing that the person who prescribes the medication should be the  
7  
8 3 person to initiate discussion of discontinuation. This was especially the case if a patient has  
9  
10 4 been on the medication long-term and may not have considered stopping. However, taking a  
11  
12 5 proactive approach was not always considered feasible in practice; continuity may facilitate  
13  
14 6 discussions of antidepressant withdrawal, though it is not always possible in primary care.  
15  
16  
17  
18 7 Some of the HPs referred to the discussion of discontinuation as a shared decision process.  
19  
20 8 They talked about the need to assess the patient's capacity in making decisions about  
21  
22 9 withdrawal and also negotiating with the patient to come to a shared decision about whether  
23  
24 10 to discontinue. One GP also suggested it must be a shared decision as GPs are currently  
25  
26 11 unable to manage the amount of work involved due to organisational factors which make  
27  
28 12 having these conversations more challenging.  
29  
30  
31  
32  
33  
34  
35  
36  
37  
38  
39  
40  
41  
42  
43  
44  
45  
46  
47  
48  
49  
50  
51  
52  
53  
54  
55  
56  
57  
58  
59  
60

14 *We'd say that because these patients are working and living in the community and*  
15 *are not sectioned and have capacity, that there is definitely a shared responsibility*  
16 *with the patient because it is their medicine and their mental health that we're looking*  
17 *after. So I'm quite happy to say it's a shared responsibility but it definitely can't be just*  
18 *a primary care clinician's because we'll not manage to cope. [GP/19/0002].*

20 The role of other HPs was also discussed with regards to conversations around  
21 discontinuing antidepressants. Though nurses have been considered to play a role in the  
22 discussions around withdrawal, there is acknowledgement that there are limitations  
23 regarding their authority and experience in managing medications, and often patients are

1  
2  
3  
4 1 signposted to their GP by their nurse. Social workers, pharmacists, care co-ordinators and  
5  
6 2 psychiatrists were also mentioned as potential sources of additional support in stopping  
7  
8 3 antidepressants, in some cases.  
9

10  
11 4  
12  
13  
14 5 Theme 2: Risk of destabilising current situation  
15

16  
17 6 Some HPs described it being easier to continue prescribing rather than raising  
18  
19 7 discontinuation with patients and acknowledged a need to initiate more discussions about  
20  
21 8 discontinuation with patients who may be eligible. There were concerns about instigating  
22  
23 9 discussions with patients who are currently well as they did not want to risk destabilising the  
24  
25 10 current situation. It was considered less risky to continue prescribing.  
26  
27  
28  
29

30  
31  
32  
33 12 *I think about - not just to patients but also to healthcare professionals or GPs - to*  
34  
35 13 *reduce the medication is the concern that they might be working and reducing might*  
36  
37 14 *destabilise a current stable situation, especially if the patient has been very, very*  
38  
39 15 *difficult to control in the past and hasn't got the support network perhaps.*  
40  
41 16 [GP/12/0001].  
42  
43  
44  
45

46 17  
47  
48  
49 18 There was an assumption that patients also do not want to risk upsetting the current  
50  
51 19 situation if they are feeling well.  
52  
53

54 20  
55  
56  
57 21 *I think for a lot that are on them, there is a massive fear factor about stopping,*  
58  
59 22 *because they remember how awful they felt. They don't want to feel like that. They*  
60



1  
2  
3  
4 1 *feel well again and they just think, well, you know, I'd rather just keep the status quo.*

5  
6 2 [GP/03/0004].

7  
8  
9 3

10  
11  
12 4

13  
14  
15 5 Theme 3: Continuity and knowing the patient makes it easier to discuss discontinuation

16  
17  
18 6 Involvement in the initial prescription was perceived to place responsibility on the prescriber  
19  
20 7 to prompt discontinuation at a later date, and an opportunity to discuss and set patient  
21  
22 8 expectations around withdrawal. Explaining to a patient at the initial prescription that  
23  
24 9 discontinuation will be discussed at a later date was seen to be a facilitator in broaching the  
25  
26  
27 10 subject of discontinuation later down the line.

28  
29  
30 11

31  
32  
33 12 *The very first consultation if you're actually selling the idea of some medication being*  
34  
35 13 *helpful, that it's for a specific time period, expecting someone to be able to be able to*  
36  
37 14 *come off it at about six months, so suggest your timescale of appointments and then*  
38  
39 15 *say, 'Oh, see you in about five months from the initiation of treatment. At that point,*  
40  
41 16 *we can actually make a plan for withdrawal and I would be planning to withdraw it*  
42  
43 17 *slowly if everything was going well in your life'. [GP/11/0004].*

44  
45  
46  
47  
48 18

49  
50  
51 19 There were a number of facilitators to discussing discontinuation with patients. These  
52  
53 20 included knowledge of the patient's experience with antidepressants, their triggers for  
54  
55 21 depression, why they started their medication and how things have changed since the initial  
56  
57  
58  
59  
60

1  
2  
3  
4 1 prescription. This again suggests that continuity is beneficial, especially in terms of reducing  
5  
6 2 risk.

7  
8  
9 3  
10  
11  
12 4 Theme 4: A HP's confidence in their skills and knowledge

13  
14  
15 5 HPs discussed their confidence in their skills and knowledge about antidepressant  
16  
17 6 discontinuation. Some of the HPs reported a lack of confidence, knowledge and skill with  
18  
19 7 regards to antidepressant discontinuation which could act as a barrier to broaching the  
20  
21 8 subject of stopping with patients. There was an awareness that discussing discontinuation  
22  
23 9 with patients is something that could be improved upon.  
24  
25  
26  
27  
28  
29  
30

31 11 *As a GP, I think for GPs, I think we're very good at starting patients on it. We are*  
32  
33 12 *good at titrating the dose up. Pretty good at picking the right medications suitable for*  
34  
35 13 *the patients, because they have different side effects over spectrums. But what we're*  
36  
37 14 *probably not good enough, at the moment, is sort of the long-term managing and the*  
38  
39 15 *coming-off part. [GP/12/0001]*  
40  
41  
42  
43  
44  
45

46 17 HPs discussed a need for more support and information for themselves as well as for  
47  
48 18 patients. They spoke about NICE guidance on antidepressant discontinuation, with many of  
49  
50 19 the HPs being unfamiliar with the guidance or not using them. They described being  
51  
52 20 dissatisfied and, in one case, irritated by the current guidance. They highlighted that it is  
53  
54 21 unclear (especially regarding tapering regimes), limited, not accessible and at times not  
55  
56 22 applicable to real patients.  
57  
58  
59  
60

1  
2  
3  
4 1  
5  
6  
7 2

*I don't think there's a lot of resources out there to kind of what to say and how to do it.*

8  
9 3

*I'm sure I've looked at the guidelines before and I thought a bit pants. [NP/12/0001].*

10  
11  
12 4  
13  
14

#### 5 Theme 5: Organisational barriers and enablers to discussing discontinuation

16  
17  
18 6 The above processes are shaped by the context surrounding them, with environmental work19  
20 7 contributing to decision making around discontinuation. Some aspects of the healthcare21  
22 8 system were described as further barriers to antidepressant discontinuation. A lack of23  
24 9 continuity was reported with patients seeing different practitioners each time, and these25  
26 10 practitioners were at times providing inconsistent recommendations. This may act as a27  
28 11 barrier to discussing discontinuation due to the perceived need to be familiar with a patient to29  
30 12 discuss withdrawal, and the idea that the responsibility for raising the topic of discontinuation31  
32 13 lies with the HP who initially prescribed the antidepressant.33  
34 14 HPs repeatedly noted the challenge of time constraints in practice and how this is often a35  
36 15 barrier to both initiating and managing discontinuation due to ten minute consultations not37  
38 16 being long enough, and not having the time for review appointments.39  
40  
41  
42  
43  
44  
45  
46 1747  
48 18 *things are ticking along relatively okay, you know it's not going to be necessarily a*49  
50 19 *straightforward consultation and it might be time consuming, it might delay you and*51  
52 20 *you haven't got enough appointments anyway and da, da, da, da, you can see how*53  
54 21 *that, as a clinician, restrains you from perhaps rocking the boat. [GP/11/0002].*55  
56  
57  
58  
59 22  
60

1  
2  
3  
4 1 HPs also mentioned the role of computer systems, explaining that patients can get lost in the  
5  
6 2 system and that systems which adequately prompt medication reviews would be useful in  
7  
8 3 broaching discontinuation with patients.  
9

## 10 11 4 12 13 14 5 **Discussion**

15  
16  
17 6 In this paper we explored HP perspectives on discontinuing long-term antidepressants in  
18  
19 7 primary care. Five themes were identified and covered who is responsible for broaching the  
20  
21 8 subject of discontinuation, how fear of relapse can dissuade HPs from discontinuing,  
22  
23 9 familiarity with the patient as enabling conversations around withdrawal, the lack of  
24  
25 10 information and support for HPs, and organisational barriers and enablers. With regards to  
26  
27 11 NPT, there is relational work that goes into negotiating responsibility and shared decision-  
28  
29 12 making about antidepressant discontinuation. This relational work is founded on familiarity  
30  
31 13 with the patient and knowledge of their experiences with depression and antidepressants.  
32  
33 14 There is process work that goes into intervening, managing the consequences of withdrawal  
34  
35 15 and avoiding destabilisation of a patient during and following discontinuation. This is founded  
36  
37 16 on enacting generalisable clinical knowledge and practice with confidence. These processes  
38  
39 17 are then shaped by contextual mechanisms and there is environmental work that goes into  
40  
41 18 negotiating the decision to discontinue antidepressants.  
42  
43  
44  
45  
46  
47  
48

49 19 An important theme identified in the current paper is a contention in terms of who is  
50  
51 20 responsible for broaching the topic of discontinuing antidepressants. While the majority of  
52  
53 21 HPs acknowledged that the responsibility may lie with the GP or be a shared decision with  
54  
55 22 patients, they indicated that they currently do not initiate these conversations as much as  
56  
57 23 they feel they ought to. There is limited evidence of this in previous research with one study  
58  
59  
60

1  
2  
3  
4 1 reporting that some GPs expect patients to contact their practitioner when they wish to make  
5  
6 2 changes to or discontinue their antidepressant [20].  
7  
8

9 3 The shift in recent decades in primary care towards expert patients and self-care relies on an  
10  
11 4 expectation of agency on behalf of the patient [30]. However depression and the long-term  
12  
13 5 use of antidepressants are associated with reduced agency (Cartwright et al., 2018). HPs  
14  
15 6 appear to be aware that there are barriers for patients in initiating conversations about  
16  
17 7 withdrawal. The logical implication of this would be that GPs take the responsibility for  
18  
19 8 initiating these conversations. However, despite GPs' awareness of the need to improve on  
20  
21 9 the current situation, these conversations about discontinuation are often not routinely being  
22  
23 10 initiated by GPs.  
24  
25  
26  
27  
28

29 11 GPs in the current study discussed a tension between being more proactive in their role and  
30  
31 12 their full workload, which in effect limits opportunities to demarcate time for focused  
32  
33 13 discussion about discontinuation. Among the factors enabling discussion about  
34  
35 14 discontinuation were knowing the patient and continuity of care. However, in current UK  
36  
37 15 primary care, patients do not always see the same GP and GPs therefore may be unable to  
38  
39 16 build the desired relationship with or acquire the desired knowledge of a patient before  
40  
41 17 broaching the subject of stopping antidepressants. This suggests that the way primary care  
42  
43 18 often operates does not lend itself to the desired context for discussing withdrawal, which  
44  
45 19 results in a bias towards inaction in terms of withdrawing patients from antidepressants. One  
46  
47 20 implication is that familiarisation with the patient's situation should be achieved through  
48  
49 21 medical notes and through discussion with the patient. However, time constraints may mean  
50  
51 22 that consultations are not long enough to gather the desired information about the patient  
52  
53 23 before discussing withdrawal. If it were agreed that initial discussions should be triggered by  
54  
55 24 the GP, this would bring clarity to the currently uncertain system. With a more clearly  
56  
57  
58  
59  
60

1 articulated plan, GPs may be better able to arrange appointments (perhaps double  
2 appointments where necessary) to discuss discontinuation.  
3 HPs reported fear of destabilising currently well patients by discontinuing antidepressants; a  
4 fear which has been evidenced in patients and GPs [20,21,31]. This emphasis on avoiding  
5 negative outcomes over focusing on the longer-term benefits of discontinuation may result in  
6 a preference for deferring discussions of withdrawal. However when comparing  
7 antidepressant maintenance treatment to tapering with psychological support, long-term  
8 relapse rates for depression are comparable [32–34] or in some cases lower for patients  
9 receiving psychological therapy [35,36]. It may therefore be useful to reassure HPs that the  
10 risk of relapse may be minimised if discontinuation is accompanied by appropriate  
11 psychological support (though there is still a need for further work on providing support for  
12 patients who are discontinuing antidepressants) [32,36,37].  
13 HPs report dissatisfaction with the current guidelines and acknowledge gaps in their own  
14 knowledge regarding antidepressant withdrawal. One other study has highlighted that GPs  
15 feel guidelines could provide more specific information about antidepressant treatment and  
16 discontinuation [20]. This suggests a need to provide improved guidance and enhanced  
17 accessibility to and awareness of guidance on discontinuation, including specific guidance  
18 on reducing the doses of different antidepressants. This may increase HP confidence in their  
19 ability to support patients through discontinuation. This increased confidence in the HP  
20 ability to manage discontinuation may then also help to lessen the HP's fear of disrupting the  
21 status quo and the risk of patient relapse.

## 23 **Strengths and Limitations**

1  
2  
3  
4 1 This study is the first to explore HP perspectives of antidepressant discontinuation in UK  
5  
6 2 primary care, with its larger sample consisting of a range of HP roles (including GPs, GP  
7  
8 3 assistants, nurses, community mental health team workers and psychotherapists) which  
9  
10 4 were lacking in previous research (e.g. Bosman et al., 2016; Dickinson et al., 2010; Iden et  
11  
12 5 al., 2011; Johnson et al., 2017; Johnston et al., 2007; Pollock and Grime, 2002). GPs were  
13  
14 6 the largest group among our interviewees, compared to the other professionals, which aligns  
15  
16 7 with the current prescribing activity with the large majority of long-term antidepressants  
17  
18 8 prescribed and monitored by GPs. This fits with our finding that GPs are often considered  
19  
20 9 responsible for initiating conversations around withdrawal. However we also identified that  
21  
22 10 there are a number of professionals who may be involved in discontinuation (e.g.  
23  
24 11 pharmacists, social workers and care co-ordinators) and further research may be needed to  
25  
26 12 explore these perspectives. In particular it may be of interest to explore differences between  
27  
28 13 professions.

29  
30  
31  
32  
33  
34  
35 14 The use of focus groups facilitated discussion and provided candid responses from  
36  
37 15 participants. However it is possible for discussions to become polarised or influenced by  
38  
39 16 more dominant members of the group. For example, in a focus group of nine GPs, there  
40  
41 17 were two more dominant members and two members who spoke less frequently. As such,  
42  
43 18 some participants' views may be less well represented in a group setting. Giving participants  
44  
45 19 an opportunity to provide feedback on the study's findings might have helped provide greater  
46  
47 20 representation.

## 21 22 **Conclusion**

1  
2  
3  
4 1 Previous research has highlighted time constraints and fear of relapse as barriers to GPs  
5  
6 2 discontinuing antidepressants and one previous study found that some GPs expected  
7  
8 3 patients to initiate discussions of discontinuation. The current study has explored these  
9  
10 4 barriers in detail in UK primary care health professionals and highlighted additional factors  
11  
12  
13 5 influencing decisions around discontinuation such as organisational barriers, a need for  
14  
15 6 clearer guidance as well as a desire to know the patient well. Our findings highlight a need to  
16  
17  
18 7 support HPs in antidepressant discontinuation in terms of providing specific information and  
19  
20 8 guidance on how to discontinue antidepressants. They also suggest HPs would benefit from  
21  
22  
23 9 support and guidance around fears of patient relapse and awareness of the need to initiate  
24  
25 10 discussions about discontinuation. Future research is needed to explore ways in which HPs  
26  
27  
28 11 can be supported in managing antidepressant discontinuation in primary care and in a way  
29  
30 12 that is acceptable to and effective for patients.  
31  
32  
33  
34  
35  
36  
37  
38  
39  
40  
41  
42  
43  
44  
45  
46  
47  
48  
49  
50  
51  
52  
53  
54  
55  
56  
57  
58  
59  
60



## 1 **Acknowledgements**

2 The authors would like to take this opportunity to thank all contributors, collaborators and  
3 team members of the REDUCE programme, including our Patient and Public Involvement  
4 (PPI) representatives, Bryan Palmer, Susan Collins and Margaret Bell.

## 6 **Funding**

7 This report is independent research funded by the National Institute for Health Research  
8 (Programme Grants for Applied Research, REDUCE RP-PG-1214-20004). The views  
9 expressed in this publication are those of the author(s) and not necessarily those of the  
10 NHS, the National Institute for Health Research or the Department of Health.

## 12 **Data Sharing**

13 This is a qualitative study and therefore the data is not suitable for sharing beyond what is  
14 contained within the report. Further information can be requested from the corresponding  
15 author.

## 17 **Competing Interests**

18 None to declare.

## 20 **Author Contributions**

21 HB is a research fellow working on the REDUCE programme and contributed toward  
22 analysis and second coding of data, and the writing of this paper. SW is the qualitative  
23 researcher currently working on the REDUCE programme and led the research, data  
24 collection, analysis and contributed to the writing of this paper. AG and GL are co-applicants

1  
2  
3 1 on the REDUCE programme and contributed towards the analysis. WOB is the Programme  
4  
5  
6 2 Manager on the REDUCE programme, had oversight of the research and data collection. TK  
7  
8 3 is the Chief Investigator of the research thereby leading on the programme and contributed  
9  
10 4 towards analysis and interpretation of data. All co-authors have substantially contributed to  
11  
12  
13 5 the writing of this article, provided critical revision and gave final approval of the published  
14  
15  
16 6 version. All authors agree to be accountable for all aspects of the work in ensuring that  
17  
18 7 questions related to the accuracy or integrity of any part of the work are appropriately  
19  
20 8 investigated and resolved.  
21  
22  
23 9  
24  
25  
26  
27  
28  
29  
30  
31  
32  
33  
34  
35  
36  
37  
38  
39  
40  
41  
42  
43  
44  
45  
46  
47  
48  
49  
50  
51  
52  
53  
54  
55  
56  
57  
58  
59  
60

1  
2  
3  
4 1 **References**

- 5  
6 2 1 Kendrick T, Stuart B, Newell C, *et al.* Did NICE guidelines and the Quality Outcomes  
7 3 Framework change GP antidepressant prescribing in England? Observational study  
8 4 with time trend analyses 2003–2013. *J Affect Disord* 2015;**186**:171–7.  
9 5 doi:10.1016/j.jad.2015.06.052
- 10  
11  
12  
13 6 2 Moore M, Yuen HM, Dunn N, *et al.* Explaining the rise in antidepressant prescribing: a  
14 7 descriptive study using the general practice research database. *BMJ* 2009;**339**:b3999.  
15 8 doi:10.1136/BMJ.B3999
- 16  
17  
18 9 3 Johnson CF, Macdonald HJ, Atkinson P, *et al.* Reviewing long-term antidepressants  
19 10 can reduce drug burden: A prospective observational cohort study. *Br J Gen Pract*  
20 11 2012;**62**:773–9. doi:10.3399/bjgp12X658304
- 21  
22  
23  
24 12 4 Petty DR, House A, Knapp P, *et al.* Prevalence, duration and indications for  
25 13 prescribing of antidepressants in primary care. *Age Ageing* 2006;**35**:523–6.  
26 14 doi:10.1093/ageing/af023
- 27  
28  
29 15 5 Scholes S, Faulding S, Mindell J. Use of prescribed medicines. 2014. 1–27.
- 30  
31 16 6 Stansfield S, Clark C, Bebbington P, *et al.* Common mental disorders. In: *Mental*  
32 17 *Health and Wellbeing in England: Adult Psychiatric Morbidity Survey 2014*. Leeds: :  
33 18 NHS Digital 2016.  
34 19 [https://assets.publishing.service.gov.uk/government/uploads/system/uploads/attachm](https://assets.publishing.service.gov.uk/government/uploads/system/uploads/attachment_data/file/556596/apms-2014-full-rpt.pdf)  
35 20 [ent\\_data/file/556596/apms-2014-full-rpt.pdf](https://assets.publishing.service.gov.uk/government/uploads/system/uploads/attachment_data/file/556596/apms-2014-full-rpt.pdf) (accessed 25 Jun 2018).
- 36  
37  
38 21 7 Ambresin G, Palmer V, Densley K, *et al.* What factors influence long-term  
39 22 antidepressant use in primary care? Findings from the Australian diamond cohort  
40 23 study. *J Affect Disord* 2015;**176**:125–32. doi:10.1016/j.jad.2015.01.055
- 41  
42  
43  
44 24 8 Cruickshank G, MacGillivray S, Bruce D, *et al.* Cross-sectional survey of patients in  
45 25 receipt of long-term repeat prescriptions for antidepressant drugs in primary care.  
46 26 *Ment Health Fam Med* 2008;**5**:105–9.
- 47  
48  
49 27 9 Piek E, Kollen BJ, van der Meer K, *et al.* Maintenance Use of Antidepressants in  
50 28 Dutch General Practice: Non-Guideline Concordant. *PLoS One* 2014;**9**:e97463.  
51 29 doi:10.1371/journal.pone.0097463
- 52  
53  
54  
55 30 10 Middleton D, Cameron I, Reid I. Continuity and monitoring of antidepressant therapy  
56 31 in a primary care setting. *Qual Prim Care* 2011;**19**:109–13.
- 57  
58  
59  
60

- 1  
2  
3  
4 1 11 Sinclair JE, Aucott LS, Lawton K, *et al*. The monitoring of longer term prescriptions of  
5 2 antidepressants: Observational study in a primary care setting. *Fam Pract*  
6 3 2014;**31**:419–26. doi:10.1093/fampra/cmu019  
7  
8  
9 4 12 Ferguson JM. SSRI Antidepressant Medications: Adverse Effects and Tolerability.  
10 5 *Prim Care Companion J Clin Psychiatry* 2001;**3**:22–7. doi:10.4088/PCC.v03n0105  
11  
12  
13 6 13 Coupland C, Dhiman P, Morriss R, *et al*. Antidepressant use and risk of adverse  
14 7 outcomes in older people: population based cohort study. *Bmj* 2011;**343**:d4551–  
15 8 d4551. doi:10.1136/bmj.d4551  
16  
17  
18 9 14 Goodwin GM, Price J, De Bodinat C, *et al*. Emotional blunting with antidepressant  
19 10 treatments: A survey among depressed patients. *J Affect Disord* 2017;**221**:31–5.  
20 11 doi:10.1016/j.jad.2017.05.048  
21  
22  
23  
24 12 15 Ilyas S, Moncrieff J. Trends in prescriptions and costs of drugs for mental disorders in  
25 13 England, 1998–2010. *Br J Psychiatry* 2012;**200**:393–8.  
26 14 doi:10.1192/bjp.bp.111.104257  
27  
28  
29 15 16 Health and Social Care Information Centre. Improving Access to Psychological  
30 16 Therapies Report, April 2015 Final and Quarter 4 2014/15. 2015.  
31 17 <http://www.hscic.gov.uk/catalogue/PUB17880>  
32  
33  
34 18 17 Health and Social Care Information Centre. Prescriptions Dispensed in the  
35 19 Community - Statistics for England, 2006-2016 - NHS Digital.  
36 20 2017.[https://digital.nhs.uk/data-and-information/publications/statistical/prescriptions-](https://digital.nhs.uk/data-and-information/publications/statistical/prescriptions-dispensed-in-the-community/prescriptions-dispensed-in-the-community-statistics-for-england-2006-2016-pas)  
37 21 [dispensed-in-the-community/prescriptions-dispensed-in-the-community-statistics-for-](https://digital.nhs.uk/data-and-information/publications/statistical/prescriptions-dispensed-in-the-community/prescriptions-dispensed-in-the-community-statistics-for-england-2006-2016-pas)  
38 22 [england-2006-2016-pas](https://digital.nhs.uk/data-and-information/publications/statistical/prescriptions-dispensed-in-the-community/prescriptions-dispensed-in-the-community-statistics-for-england-2006-2016-pas) (accessed 2 Jul 2018).  
39  
40  
41  
42  
43 23 18 Independent Research Service of the House of Commons Library. No Title.  
44 24 2008.<http://researchbriefings.parliament.uk/%0AJohnson%0A>  
45  
46  
47 25 19 Eveleigh R, Grutters J, Muskens E, *et al*. Cost-utility analysis of a treatment advice to  
48 26 discontinue inappropriate long-term antidepressant use in primary care. *Fam Pract*  
49 27 2014;**31**:578–84. doi:10.1093/fampra/cmu043  
50  
51  
52 28 20 Bosman RC, Huijbregts KM, Verhaak PFM, *et al*. Long-term antidepressant use: A  
53 29 qualitative study on perspectives of patients and GPs in primary care. *Br J Gen Pract*  
54 30 2016;**66**:e708–19. doi:10.3399/bjgp16X686641  
55  
56  
57  
58 31 21 Johnson CF, Williams B, Macgillivray SA, *et al*. 'Doing the right thing': Factors  
59 32 influencing GP prescribing of antidepressants and prescribed doses. *BMC Fam Pract*

- 1  
2  
3  
4 1 2017;**18**:1–13. doi:10.1186/s12875-017-0643-z
- 5  
6 2 22 Maund E, Ryves R, Williams S, *et al*. Barriers and facilitators to discontinuing  
7 3 antidepressant use: a systematic review and thematic synthesis. *Manuscr Submitt*  
8 4 *Publ*2018.
- 9  
10  
11 5 23 REDUCE (REviewing long term anti-Depressant Use by Careful monitoring in  
12 6 Everyday practice).  
13 7 2016.[https://www.southampton.ac.uk/medicine/academic\\_units/projects/reduce.page](https://www.southampton.ac.uk/medicine/academic_units/projects/reduce.page)  
14 8 (accessed 29 Jun 2018).
- 15  
16  
17  
18 9 24 May C, Finch T. Implementing, embedding, and integrating practices: An outline of  
19 10 normalization process theory. *Sociology* 2009;**43**:535–54.  
20 11 doi:10.1177/0038038509103208
- 21  
22  
23  
24 12 25 Asbury J-E. Overview of Focus Group Research. *Qual Health Res* 1995;**5**:414–20.  
25 13 doi:10.1177/104973239500500402
- 26  
27  
28 14 26 Braun V, Clarke V. Using thematic analysis in psychology. *Qual Res Psychol*  
29 15 2006;**3**:77–101. doi:10.1191/1478088706qp063oa
- 30  
31  
32 16 27 Glaser BG. *Theoretical Sensitivity*. Mill Valley, C.A.: : Sociology Press 1978.
- 33  
34 17 28 Glaser BG. *Discovery of Grounded Theory*. Chicago: : Aldine 1992.
- 35  
36 18 29 Glaser BG, Strauss AL. *The discovery of grounded theory: Strategies for qualitative*  
37 19 *research*. Chicago: : Aldine 1967.
- 38  
39  
40 20 30 Department of Health. The Expert Patient: A New Approach to Chronic Disease  
41 21 Management for the 21st Century. 2001.  
42 22 [http://webarchive.nationalarchives.gov.uk/20120511062115/http://www.dh.gov.uk/prod\\_consum\\_dh/groups/dh\\_digitalassets/@dh/@en/documents/digitalasset/dh\\_4018578](http://webarchive.nationalarchives.gov.uk/20120511062115/http://www.dh.gov.uk/prod_consum_dh/groups/dh_digitalassets/@dh/@en/documents/digitalasset/dh_4018578.pdf)  
43 23 [.pdf](http://webarchive.nationalarchives.gov.uk/20120511062115/http://www.dh.gov.uk/prod_consum_dh/groups/dh_digitalassets/@dh/@en/documents/digitalasset/dh_4018578.pdf) (accessed 29 Jun 2018).  
44 24
- 45  
46  
47  
48 25 31 Dickinson R, Knapp P, House AO, *et al*. Long-term prescribing of antidepressants in  
49 26 the older population: A qualitative study. *Br J Gen Pract* 2010;**60**:257–9.  
50 27 doi:10.3399/bjgp10X483913
- 51  
52  
53  
54 28 32 Kuyken W, Hayes R, Barrett B, *et al*. Effectiveness and cost-effectiveness of  
55 29 mindfulness-based cognitive therapy compared with maintenance antidepressant  
56 30 treatment in the prevention of depressive relapse or recurrence (PREVENT): a  
57 31 randomised controlled trial. *Lancet* 2015;**386**:63–73. doi:10.1016/S0140-  
58  
59  
60

- 1  
2  
3  
4 1 6736(14)62222-4  
5  
6 2 33 Kuyken W, Byford S, Watkins E, *et al.* Mindfulness-Based Cognitive Therapy to  
7 3 Prevent Relapse in Recurrent Depression. *J Consult Clin Psychol* 2008;**76**:966–78.  
8 4 doi:10.1037/a0013786  
9  
10  
11 5 34 Bockting CLH, ten Doesschae MC, Spijker J, *et al.* Continuation and maintenance use  
12 6 of antidepressants in recurrent depression. *Psychother psychomatics* 2008;**77**:17–26.  
13  
14  
15 7 35 Fava GA, Gandi S, Zielezny M, *et al.* Cognitive behavioral treatment of residual  
16 8 symptoms in primary major depressive disorder. *Am J Psychiatry* 1994;**151**:1295–9.  
17 9 doi:10.1176/ajp.151.9.1295  
18  
19  
20 10 36 Fava GA, Rafanelli C, Grandi S, *et al.* Prevention of Recurrent Depression With  
21 11 Cognitive Behavioral Therapy. *Arch Gen Psychiatry* 1998;**55**:816–20.  
22  
23  
24 12 37 Huijbers MJ, Spijker J, Donders ART, *et al.* Preventing relapse in recurrent  
25 13 depression using mindfulness-based cognitive therapy, antidepressant medication or  
26 14 the combination: trial design and protocol of the MOMENT study. *BMC Psychiatry*  
27 15 2012;**12**:125. doi:10.1186/1471-244X-12-125  
28  
29  
30  
31 16 38 Iden KR, Hjørleifsson S, Ruths S. Treatment decisions on antidepressants in nursing  
32 17 homes: A qualitative study. *Scand J Prim Health Care* 2011;**29**:252–6.  
33 18 doi:10.3109/02813432.2011.628240  
34  
35  
36  
37 19 39 Johnston O, Kumar S, Kendall K, *et al.* Qualitative study of depression management  
38 20 in primary care: GP and patient goals, and the value of listening. *Br J Gen Pract*  
39 21 2007;**57**:872–9. doi:10.3399/096016407782318026  
40  
41  
42 22 40 Pollock K, Grime J. Understanding Depression and its Treatment: GP, Patient and  
43 23 Pharmacist Perspectives Final Report of the Concordance Fellowship. Published  
44 24 Online First:  
45 25 2002.[https://www.researchgate.net/profile/Janet\\_Grime/publication/242754232\\_Understanding\\_Depression\\_and\\_its\\_Treatment\\_GP\\_Patient\\_and\\_Pharmacist\\_Perspectives/links/0deec52fb4ce320e66000000.pdf](https://www.researchgate.net/profile/Janet_Grime/publication/242754232_Understanding_Depression_and_its_Treatment_GP_Patient_and_Pharmacist_Perspectives/links/0deec52fb4ce320e66000000.pdf) (accessed 9 May 2017).  
46 26  
47 27  
48  
49  
50  
51  
52  
53 28  
54  
55 29  
56  
57  
58  
59  
60

1  
2  
3  
4  
5  
6  
7  
8  
9  
10  
11  
12  
13  
14  
15  
16  
17  
18  
19  
20  
21  
22  
23  
24  
25  
26  
27  
28  
29  
30  
31  
32  
33  
34  
35  
36  
37  
38  
39  
40  
41  
42  
43  
44  
45  
46  
47  
48  
49  
50  
51  
52  
53  
54  
55  
56  
57  
58  
59  
60

1 **Figure legend**

2 Figure 1. Diagram of the relationships between themes.

For peer review only

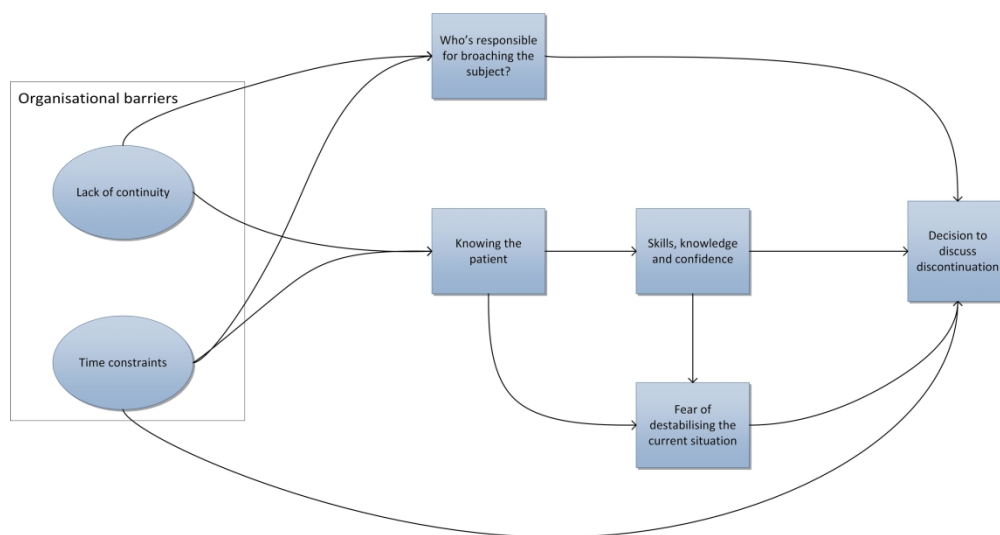

Figure 1. Diagram of the relationships between themes

270x141mm (300 x 300 DPI)



**REDUCE Study Workstream 2: REviewing long-term anti-Depressant treatment Use by Careful monitoring in Everyday practice**

**TOPIC GUIDE FOR PRACTITIONER FOCUS GROUPS**

**Introduction**

1. **Welcome** and thank you for volunteering to take part in this focus group. You have been asked to participate as your point of view is important. I realize you are busy and I appreciate your time. Name and role on study.
2. **Introduction:** This focus group discussion is designed to assess your current views and experiences with patients withdrawing from long-term antidepressants, why they might wish to withdraw, and why withdrawal might be difficult. The aim is to develop new ways of helping people withdraw from treatment, taking into account the difficulties they might face.
3. **By way of reminder:**
  - Check participants are still willing to take part, notes that observers are present, and will be audio recorded.
  - Remind them it will take approximately 60 minutes.
  - Their responses will be kept confidential, and quotes used will not identify them.
  - They can change their mind about taking part in the study and stop at any point.
4. **Rules of engagement in focus groups:**
  - To speak one at a time, and allow others to finish their point.
  - To respect each other's point of view, whilst disagreeing if they wish.
  - To be honest even when their responses may not be in agreement with the group.
  - That responses made by all participants be kept confidential – what is said here stays here.
  - The study is to ask them about their experiences and views of helping patients to stop taking antidepressants. Therefore there are no right or wrong answers as it is their views that are important to us.
5. **Ask if the participants have any questions.**
6. **Start recording.**

**WARM UP**

*Firstly, I'd like everyone to introduce themselves. Please could you tell us your name, job role and where you're based?*

## Topic 1: Long-term antidepressant use and knowing when discontinuation may be appropriate

- 1  
2  
3  
4  
5
1. I would like to invite you to share any clinical experiences you have of discontinuing antidepressants with a patient.

6 Prompts:

- 7 - Explain what happened and why?  
8 - What is your current clinical practice for discontinuation?  
9 - What problems have you encountered when discontinuing antidepressants?  
10 - What have you found to help patients to discontinue their antidepressants?  
11

- 12  
13  
14
2. What factors would you look for that indicate a patient is appropriate to discontinue from long-term antidepressants?

15 Prompts:

- 16  
17 a. Examples: Recovery, patient request, risk of side effects, potential benefits of discontinuation.  
18 b. What impact might user experiences have on decision to discontinue ADs?  
19 c. How do you come to the decision to stop a patients antidepressants?  
20  
21  
22  
23
3. Can you think of any practical considerations that may occur when considering antidepressant discontinuation?

24 Prompts:

- 25 - How quickly do you taper antidepressants (if done)?  
26 - Lack of dosage forms available to facilitate tapering.  
27 - How solve these issues.  
28  
29  
30  
31
4. What are your thoughts on current guideline recommendations for long-term antidepressant use?

32 Prompts:

- 33 - What are your thoughts on the current NICE guidelines?  
34 - How easy are the guidelines to follow?  
35 - What questions do the guidelines leave you with?  
36 - Any thoughts on presentation?  
37

38 *Hand out copies of current NICE Guidelines.*

## Topic 2: Negotiating the decision to discontinue antidepressants with patients.

- 40  
41  
42  
43  
44
5. How do you negotiate discontinuation of antidepressant medication with a patient?

45 Prompts:

- 46 - Whose decision is it in the end (to stop)?  
47 - At what point is the discussion usually initiated?  
48 - How do you feel about broaching the subject of discontinuation? How much do you push for people to  
49 withdraw? Perception of risk vs patient's wishes?  
50

- 51  
52  
53
6. What is your involvement in discontinuing antidepressants with a patient?

54 Prompts:

- 55 - Can you explain why you might not get involved?  
56 - What process do you follow if this topic is brought up by a patient?  
57 - Have you ever discussed discontinuation of antidepressants with a patient?  
58 - What would you like your involvement to be in the future?  
59  
60

## CHECK FOR COMMENTS / QUESTIONS WITH CO-FACILITATOR

**Topic 3: Role as a GP/NP/PCMHW in terms of supporting/negotiating appropriateness of discontinuation**7. What do you see as your role in negotiating medication discontinuation?

*Invite to draw on real life clinical examples and ask to explain what happened.*

## Prompts:

- How typically do you view your role in the stopping process from deciding to stop through to stopping (or not)?
- Role of other HPs in dealing with medication discontinuation – GP, NP, Therapist, pharmacist, psychiatrist, etc.
- Relationships between practitioners?

**Topic 4: How to optimise discussions about possible discontinuation with patients**8. Can you think of ways to improve discussions about possible discontinuation with patients?

## Prompts:

- Usefulness of verbal / written advice to aid discontinuation.
- Role of support networks and ways of bringing others into the process where appropriate? Uses (e.g. decision making tools, source of social support, support /challenge /resistance to medical decision)? Challenges around introducing?
- How would you evaluate and monitor discontinuation (e.g. evaluate success)?

**Topic 5: Ways to optimise implementation of a discontinuation intervention in routine practice**9. What would you like to see in an intervention to help people stop antidepressants?

## Prompts:

- Supportive needs of patients / practitioners?
- Content / mode of delivery?
- Help from other team members?
- Help from outside the practice?
- How would you like to interact with the intervention?
- Would you like to see anyone else interacting with the intervention?
- What do you see as the role of a GP/NP/PCMHW as part of the intervention?
- **PCMHWs/NPs only:** How would you view the role of providing telephone support? In principle, if trained and paid to work on this for the study (as opposed to long-term) would this be something you'd be interested in / feel able to do?

10. What would an intervention to support treatment discontinuation look like in practice?

## Prompts:

- Organisational issues, e.g. GP prescription systems.
- Who would drive the use of the intervention forward in your practice / CCG / professional body?
- How would you maintain use of an intervention over time?
- What would encourage you to use it?

***Anything wish to raise that hasn't been discussed?***

***Any questions?***

***Moderator to check with observer for any further questions, then close focus group.***

---

**Debrief:**

- Tell participants audio recorder is now being switched off.
- Thank participants for taking part in the focus group; excellent discussion.
- Revisit consent and reply slip.
- Ask if the participants have any questions / offer opportunity to discuss further following focus group.
- Let participants know will be sending summary of results at the end of the study.
- Distribute travel claims and inform invoices will be sent to practice ASAP.
- Thank participants again for taking part.

For peer review only

## COREQ (CONsolidated criteria for REporting Qualitative research) Checklist

A checklist of items that should be included in reports of qualitative research. You must report the page number in your manuscript where you consider each of the items listed in this checklist. If you have not included this information, either revise your manuscript accordingly before submitting or note N/A.

| Topic                                          | Item No. | Guide Questions/Description                                                                                                                              | Reported on Page No. |
|------------------------------------------------|----------|----------------------------------------------------------------------------------------------------------------------------------------------------------|----------------------|
| <b>Domain 1: Research team and reflexivity</b> |          |                                                                                                                                                          |                      |
| <i>Personal characteristics</i>                |          |                                                                                                                                                          |                      |
| Interviewer/facilitator                        | 1        | Which author/s conducted the interview or focus group?                                                                                                   |                      |
| Credentials                                    | 2        | What were the researcher's credentials? E.g. PhD, MD                                                                                                     |                      |
| Occupation                                     | 3        | What was their occupation at the time of the study?                                                                                                      |                      |
| Gender                                         | 4        | Was the researcher male or female?                                                                                                                       |                      |
| Experience and training                        | 5        | What experience or training did the researcher have?                                                                                                     |                      |
| <i>Relationship with participants</i>          |          |                                                                                                                                                          |                      |
| Relationship established                       | 6        | Was a relationship established prior to study commencement?                                                                                              |                      |
| Participant knowledge of the interviewer       | 7        | What did the participants know about the researcher? e.g. personal goals, reasons for doing the research                                                 |                      |
| Interviewer characteristics                    | 8        | What characteristics were reported about the interviewer/facilitator? e.g. Bias, assumptions, reasons and interests in the research topic                |                      |
| <b>Domain 2: Study design</b>                  |          |                                                                                                                                                          |                      |
| <i>Theoretical framework</i>                   |          |                                                                                                                                                          |                      |
| Methodological orientation and Theory          | 9        | What methodological orientation was stated to underpin the study? e.g. grounded theory, discourse analysis, ethnography, phenomenology, content analysis |                      |
| <i>Participant selection</i>                   |          |                                                                                                                                                          |                      |
| Sampling                                       | 10       | How were participants selected? e.g. purposive, convenience, consecutive, snowball                                                                       |                      |
| Method of approach                             | 11       | How were participants approached? e.g. face-to-face, telephone, mail, email                                                                              |                      |
| Sample size                                    | 12       | How many participants were in the study?                                                                                                                 |                      |
| Non-participation                              | 13       | How many people refused to participate or dropped out? Reasons?                                                                                          |                      |
| <i>Setting</i>                                 |          |                                                                                                                                                          |                      |
| Setting of data collection                     | 14       | Where was the data collected? e.g. home, clinic, workplace                                                                                               |                      |
| Presence of non-participants                   | 15       | Was anyone else present besides the participants and researchers?                                                                                        |                      |
| Description of sample                          | 16       | What are the important characteristics of the sample? e.g. demographic data, date                                                                        |                      |
| <i>Data collection</i>                         |          |                                                                                                                                                          |                      |
| Interview guide                                | 17       | Were questions, prompts, guides provided by the authors? Was it pilot tested?                                                                            |                      |
| Repeat interviews                              | 18       | Were repeat interviews carried out? If yes, how many?                                                                                                    |                      |
| Audio/visual recording                         | 19       | Did the research use audio or visual recording to collect the data?                                                                                      |                      |
| Field notes                                    | 20       | Were field notes made during and/or after the interview or focus group?                                                                                  |                      |
| Duration                                       | 21       | What was the duration of the interviews or focus group?                                                                                                  |                      |
| Data saturation                                | 22       | Was data saturation discussed?                                                                                                                           |                      |
| Transcripts returned                           | 23       | Were transcripts returned to participants for comment and/or                                                                                             |                      |

| Topic                                  | Item No. | Guide Questions/Description                                                                                                        | Reported on Page No. |
|----------------------------------------|----------|------------------------------------------------------------------------------------------------------------------------------------|----------------------|
|                                        |          | correction?                                                                                                                        |                      |
| <b>Domain 3: analysis and findings</b> |          |                                                                                                                                    |                      |
| <i>Data analysis</i>                   |          |                                                                                                                                    |                      |
| Number of data coders                  | 24       | How many data coders coded the data?                                                                                               |                      |
| Description of the coding tree         | 25       | Did authors provide a description of the coding tree?                                                                              |                      |
| Derivation of themes                   | 26       | Were themes identified in advance or derived from the data?                                                                        |                      |
| Software                               | 27       | What software, if applicable, was used to manage the data?                                                                         |                      |
| Participant checking                   | 28       | Did participants provide feedback on the findings?                                                                                 |                      |
| <i>Reporting</i>                       |          |                                                                                                                                    |                      |
| Quotations presented                   | 29       | Were participant quotations presented to illustrate the themes/findings?<br>Was each quotation identified? e.g. participant number |                      |
| Data and findings consistent           | 30       | Was there consistency between the data presented and the findings?                                                                 |                      |
| Clarity of major themes                | 31       | Were major themes clearly presented in the findings?                                                                               |                      |
| Clarity of minor themes                | 32       | Is there a description of diverse cases or discussion of minor themes?                                                             |                      |

Developed from: Tong A, Sainsbury P, Craig J. Consolidated criteria for reporting qualitative research (COREQ): a 32-item checklist for interviews and focus groups. *International Journal for Quality in Health Care*. 2007. Volume 19, Number 6: pp. 349 – 357

**Once you have completed this checklist, please save a copy and upload it as part of your submission. DO NOT include this checklist as part of the main manuscript document. It must be uploaded as a separate file.**

# BMJ Open

## Helping people discontinue long-term antidepressants: Views of health professionals in UK primary care

|                                 |                                                                                                                                                                                                                                                                                                                                                                                                                                                                                                                                                                                                                                                                                                                                                          |
|---------------------------------|----------------------------------------------------------------------------------------------------------------------------------------------------------------------------------------------------------------------------------------------------------------------------------------------------------------------------------------------------------------------------------------------------------------------------------------------------------------------------------------------------------------------------------------------------------------------------------------------------------------------------------------------------------------------------------------------------------------------------------------------------------|
| Journal:                        | <i>BMJ Open</i>                                                                                                                                                                                                                                                                                                                                                                                                                                                                                                                                                                                                                                                                                                                                          |
| Manuscript ID                   | bmjopen-2018-027837.R1                                                                                                                                                                                                                                                                                                                                                                                                                                                                                                                                                                                                                                                                                                                                   |
| Article Type:                   | Research                                                                                                                                                                                                                                                                                                                                                                                                                                                                                                                                                                                                                                                                                                                                                 |
| Date Submitted by the Author:   | 19-Apr-2019                                                                                                                                                                                                                                                                                                                                                                                                                                                                                                                                                                                                                                                                                                                                              |
| Complete List of Authors:       | Bowers, Hannah; University of Southampton Faculty of Medicine, Primary Care and Population Sciences<br>Williams, Samantha; University of Southampton, Primary Care & Population Sciences<br>Geraghty, Adam; University of Southampton, Primary Care and Population Sciences<br>Maud, Emma; University of Southampton Faculty of Medicine, Primary Care and Population Sciences<br>O'brien, Wendy; University of Southampton Faculty of Medicine, Primary Care and Population Sciences<br>Leydon, Geraldine; University of Southampton, Faculty of Medicine<br>May, Carl; London School of Hygiene and Tropical Medicine Faculty of Epidemiology and Population Health<br>Kendrick, Tony; University of Southampton, Primary Care and Population Sciences |
| <b>Primary Subject Heading</b>: | Mental health                                                                                                                                                                                                                                                                                                                                                                                                                                                                                                                                                                                                                                                                                                                                            |
| Secondary Subject Heading:      | Qualitative research                                                                                                                                                                                                                                                                                                                                                                                                                                                                                                                                                                                                                                                                                                                                     |
| Keywords:                       | antidepressants, Depression & mood disorders < PSYCHIATRY, PRIMARY CARE, health professional                                                                                                                                                                                                                                                                                                                                                                                                                                                                                                                                                                                                                                                             |
|                                 |                                                                                                                                                                                                                                                                                                                                                                                                                                                                                                                                                                                                                                                                                                                                                          |

SCHOLARONE™  
Manuscripts

1  
2  
3  
4 1 Helping people discontinue long-term antidepressants: Views of health  
5  
6  
7 2 professionals in UK primary care  
8  
9  
10 3

11  
12 4 Hannah M Bowers<sup>1\*</sup>, Samantha Williams<sup>1</sup>, Adam W A Geraghty<sup>1</sup>, Emma Maund<sup>1</sup>, Wendy  
13  
14  
15 5 O'Brien<sup>1</sup>, Geraldine Leydon<sup>1</sup>, Carl May<sup>2</sup>, Tony Kendrick<sup>1</sup>  
16  
17  
18 6

19  
20 7 <sup>1</sup> Primary Care and Population Sciences Academic Unit, Faculty of Medicine, University of  
21  
22  
23 8 Southampton, Aldermoor Health Centre, Aldermoor Close, Southampton, SO16 5ST, UK  
24

25 9 <sup>2</sup> Faculty of Public health and Policy, London School of Hygiene and Tropical Medicine, 15-17  
26  
27  
28 10 Tavistock Place, London, WC1H 9SH  
29

30 11  
31  
32 12 Corresponding author: Hannah Bowers  
33

34 13 Telephone: (023) 8059 1743  
35

36 14 Email: H.M.Bowers@soton.ac.uk  
37

38 15 Address: Primary Care and Population Sciences Academic Unit, Faculty of Medicine,  
39  
40  
41 16 University of Southampton, Aldermoor Health Centre, Aldermoor Close, Southampton, SO16  
42  
43 17 5ST, UK  
44  
45  
46 18  
47  
48 19  
49  
50  
51  
52  
53  
54  
55  
56  
57  
58  
59  
60



1  
2  
3  
4  
5  
6  
7  
8  
9  
10  
11  
12  
13  
14  
15  
16  
17  
18  
19  
20  
21  
22  
23  
24  
25  
26  
27  
28  
29  
30  
31  
32  
33  
34  
35  
36  
37  
38  
39  
40  
41  
42  
43  
44  
45  
46  
47  
48  
49  
50  
51  
52  
53  
54  
55  
56  
57  
58  
59  
60

1 **Abstract** (300 words max)

2 Objective: The aim of this paper was to identify, characterise and explain clinician factors  
3 which shape decision making around antidepressant discontinuation in UK primary care.

4 Design: Four focus groups and three interviews were conducted and analysed using  
5 thematic analysis.

6 Participants: Twenty-one GPs, four GP Assistants, seven nurses and six Community Mental  
7 Health Team Workers and psychotherapists took part in focus groups and interviews.

8 Setting: Participants were recruited from seven primary care regions and two NHS Trusts  
9 providing community mental health services in the South of England.

10 Results: Participants highlighted a number of barriers and enablers to discussing  
11 discontinuation with patients. They held a range of views around responsibility, with some  
12 suggesting it was the responsibility of the health professional to broach the subject, and  
13 others suggesting responsibility rested with the patients. Health professionals were  
14 concerned about destabilising the current situation, discussed how continuity and knowing  
15 the patient facilitated discontinuation talks, and discussed how confidence in their  
16 professional skills and knowledge affected whether they elected to raise discontinuation in  
17 consultations.

18 Conclusions: Findings indicate a need to consider support for health professionals in the  
19 management of antidepressant medication and discussions of discontinuation in particular.  
20 They may also benefit from support around their fears of patient relapse and awareness of  
21 when and how to initiate discussions about discontinuation with their patients.

22  
23 **Keywords** antidepressants; depression; primary care; focus group; health professional

24

1  
2  
3  
4 1 **Strengths and limitations of this study**

- 5  
6 2 • This study explored views of primary care health professionals in relation to  
7  
8 3 antidepressant withdrawal  
9  
10 4 • Focus groups allowed participants to exchange views on the topic thereby providing  
11  
12 5 topic rich data  
13  
14 6 • Unlike previous research, this study included perspectives of non-GP health  
15  
16 7 professionals  
17  
18 8 • The use of focus groups facilitated group discussion however it is possible that the  
19  
20 9 group setting may reduce openness  
21  
22  
23  
24  
25  
26  
27  
28  
29  
30  
31  
32  
33  
34  
35  
36  
37  
38  
39  
40  
41  
42  
43  
44  
45  
46  
47  
48  
49  
50  
51  
52  
53  
54  
55  
56  
57  
58  
59  
60

## 1 Introduction

2 Antidepressant prescriptions have risen steadily since the introduction of selective serotonin  
3 reuptake inhibitors (SSRIs) in the late 1980s. This rise is primarily due to general  
4 practitioners (GPs) continuing to prescribe for longer [1,2], with the average length of  
5 treatment now at more than two years [3,4]. Around 10% of adults are currently taking  
6 antidepressants (predominantly for depression, but also for anxiety and chronic pain) [5].  
7 Some people need long-term antidepressants to prevent relapse, but surveys suggest 30-  
8 50% have no guideline-based indication for long-term use (e.g. according to the NICE  
9 Depression Guideline (2009)) [6–8]. This may be due to many patients on long-term  
10 treatment being given repeat prescriptions and being reviewed infrequently [9,10].  
11  
12 The side effects of antidepressants include weight gain, sexual dysfunction, sleep  
13 disturbance, and gastrointestinal bleeding, which increase with longer-term use [11]. SSRI  
14 use for depression in older patients is associated with increased risk of falls, fractures,  
15 seizures, stroke, and hyponatraemia [12]. Long-term treatment may lead to emotional  
16 blunting [13], impaired self-confidence and increased dependence on health services.  
17 Antidepressants constitute a substantial proportion of the NHS drug budget: 2.5% in 2010  
18 [14] and the costs of unnecessary treatment include appointments for medical or nursing  
19 reviews. The cost of GP consultations for depression exceeded £30m in 2008, in addition to  
20 the cost of the 64.7 million antidepressant prescriptions of around £266m [15,16, 17].  
21 Attempts to discontinue in the 30-50% of patients taking antidepressants without guidance-  
22 based indication may then result in reduced NHS costs while alleviating the side effects  
23 associated with antidepressant use.

24

1  
2  
3 1 Prompting GPs to review patients eligible for withdrawal was tested in a trial in the  
4  
5  
6 2 Netherlands and found to be ineffective, with 6% of patients discontinuing antidepressants in  
7  
8 3 the intervention group, and 8% in the control group [18]. Similarly, an uncontrolled trial of  
9  
10 4 pharmacist-prompted GP review of long-term users in Scotland resulted in only 7% of people  
11  
12 5 stopping [3]. Prompting alone is therefore insufficient in supporting patients to discontinue  
13  
14 6 antidepressants, which indicates there are other factors preventing GPs from attempting to  
15  
16 7 withdraw patients from antidepressants.  
17  
18  
19  
20 8

21  
22 9 While GPs play a key role in prescribing and discontinuing antidepressants, other health  
23  
24 10 professionals also advise patients about antidepressants in primary care. Previous research  
25  
26 11 with health professionals looking at antidepressant discontinuation has reported that the  
27  
28 12 main barrier is a lack of awareness of guidance on best practice in discontinuation [19].  
29  
30 13 Other barriers include a lack of awareness of patient expectations that health professionals  
31  
32 14 should initiate discussions of discontinuation, the availability of alternative treatments, time  
33  
34 15 constraints, and GP and patient fear of destabilising a currently well patient [19,20]. Further  
35  
36 16 to this, patients may experience withdrawal symptoms or relapse and require further  
37  
38 17 treatment from their practitioner [21]. A qualitative meta-synthesis of patient and practitioner  
39  
40 18 perspectives on antidepressant discontinuation highlighted a lack of consistent support and  
41  
42 19 guidance for GPs and the impact of time constraints on discontinuation [22]. However there  
43  
44 20 is only limited evidence on the health professional perspective of antidepressant  
45  
46 21 discontinuation (in particular practice nurses and community mental health workers) and  
47  
48 22 previous studies were completed outside of the UK, and one within a nursing home. Insights  
49  
50 23 into UK primary care health professional perspectives are therefore needed to determine  
51  
52 24 barriers and facilitators to supporting patients in discontinuing antidepressants in the UK.  
53  
54  
55  
56  
57  
58  
59  
60

1  
2  
3  
4 1  
5  
6 2 The REDUCE programme aims to identify ways of helping patients taking long-term  
7  
8 3 antidepressants withdraw from treatment when appropriate [23]. Normalisation Process  
9  
10 4 Theory (NPT) identifies, characterises and explains key mechanisms that motivate and  
11  
12 5 shape implementation processes [24]. It focuses attention on the work that participants in  
13  
14 6 these processes do when they seek to routinely incorporate components of complex  
15  
16 7 interventions in their everyday lives. This paper reports the findings from the health  
17  
18 8 professional (HP) focus groups as part of the REDUCE programme. Our aims were to  
19  
20 9 identify, characterise and explain clinician factors which shape decision making around  
21  
22 10 antidepressant discontinuation in UK primary care.  
23  
24  
25  
26  
27  
28  
29

## 30 12 **Methods**

### 31 13 32 14 *Participants*

33  
34  
35 15 HPs including GPs, GP Assistants, nurses, Community Mental Health Team Workers and  
36  
37 16 psychotherapists were recruited from seven primary care regions and two NHS Trusts  
38  
39 17 providing community mental health services in the South of England between January and  
40  
41 18 May 2017. GP practices and individuals were recruited via email and were invited to return a  
42  
43 19 reply slip. HPs who expressed an interest were invited to take part in one of four focus  
44  
45 20 groups taking place in the South of England between March and May 2017. Twenty-one  
46  
47 21 sites returned a reply slip, with thirty-eight participants taking part in either a focus group or  
48  
49 22 interview (22 females and 12 males). The reported range of years since qualified was 8-34.  
50  
51 23 Focus groups were chosen over individual interviews to allow participants to exchange views  
52  
53 24 on the topic thereby providing topic rich data as well as an insight into group and individual  
54  
55  
56  
57  
58  
59  
60

1  
2  
3 1 views, including important areas of consensus and disagreement. Individual interviews were  
4  
5  
6 2 offered to psychotherapists as this group was underrepresented in the focus group sample  
7  
8 3 (n=2) and to one GP in order to pilot the topic guide. Every participant was taken through the  
9  
10 4 informed consent process and given the opportunity to read the information leaflet and ask  
11  
12  
13 5 questions prior to data collection. Each focus group had between seven and ten participants  
14  
15 6 and the length of each ranged between 43 and 59 minutes.  
16  
17  
18 7

### 19 8 *Patient and Public Involvement*

20  
21  
22 9 Patient and public members of the REDUCE team were involved in discussions about the  
23  
24 10 design and recruitment for this study, and were invited to comment on initial drafts of the  
25  
26  
27 11 topic guide.  
28  
29  
30 12

### 31 13 *Ethical Approval*

32  
33  
34 14 Ethical approval to conduct the study was granted by the South Central Berkshire B  
35  
36  
37 15 Research Ethics Committee and the Health Research Authority (Reference Number  
38  
39 16 16/SC/0472).  
40  
41  
42 17  
43  
44 18  
45  
46  
47 19

### 48 20 *Focus Groups*

49 21 A topic guide was developed based around the main aims of the study (supplement 1). This  
50  
51 22 guide was developed based on a review of existing literature and discussion within a team of  
52  
53 23 academics, GPs, psychiatrists and patient contributors. Topics explored long-term  
54  
55 24 antidepressant use and knowing when discontinuation may be appropriate, negotiating the  
56  
57  
58  
59  
60

1  
2  
3  
4 1 appropriateness of discontinuation, optimising discussions around possible discontinuation,  
5  
6 2 and optimising implementation of a discontinuation intervention in routine practice.  
7  
8 3 Normalisation Process Theory [24] informed the topic guide so that the questions addressed  
9  
10 4 the processes involved in antidepressant discontinuation with regards to the four NPT  
11  
12 5 constructs (Coherence, Cognitive Participation, Collective Action, and Reflexive Monitoring).  
13  
14 6 For example, to address cognitive participation (i.e. who does the work), participants were  
15  
16 7 asked 'What do you see as your role in negotiating medication discontinuation'. The topic  
17  
18 8 guide was not limited to discussing depressive disorders and therefore was open to  
19  
20 9 discussion about antidepressant use in other conditions (e.g. anxiety and chronic pain).  
21  
22  
23  
24  
25  
26

27 11 The focus groups were conducted face-to-face and were organised pragmatically across  
28  
29 12 different geographical locations (in GP practices and a community-based health centre) in  
30  
31 13 the South of England. Two groups were held with mixed primary care HPs and two groups  
32  
33 14 with GPs only (see table 1). To acknowledge potential "group" effects (i.e. participants being  
34  
35 15 unaware of the degree to which other group members' views represent their own  
36  
37 16 experience), free participation was encouraged by the facilitators by avoiding censorship and  
38  
39 17 conformity [25]. Focus groups were facilitated by two experienced female qualitative  
40  
41 18 researchers (SW and WOB) and were audio recorded. A debriefing was conducted by the  
42  
43 19 two facilitators following each focus group to identify issues that may affect analysis (e.g.  
44  
45 20 domineering or quiet members) and suggest possible modifications to the topic guide. No  
46  
47 21 repeat interviews or focus groups were conducted.  
48  
49  
50  
51  
52  
53  
54  
55

56 23 Table 1. Number of health professionals attending each focus group or interview.  
57  
58  
59  
60

|               | Focus<br>Group<br>1 | Focus<br>Group 2 | Focus<br>Group 3 | Focus<br>Group 4 | Interview | Total (n female) |
|---------------|---------------------|------------------|------------------|------------------|-----------|------------------|
| GP            | 7                   | 2                | 2                | 9                | 1         | 21 (10)          |
| GPA           | 0                   | 4                | 0                | 0                | 0         | 4 (3)            |
| NP            | 0                   | 2                | 5                | 0                | 0         | 7 (6)            |
| CMHW<br>or PT | 0                   | 2                | 2                | 0                | 2         | 6 (3)            |
| <b>Totals</b> | 7                   | 10               | 9                | 8                | 3         | 38               |

*Notes.* GP: General Practitioner; GPA General Practitioner Assistant; NP: Nurse Practitioner; CMHW: Community Mental Health team Worker; PT: Psychological Therapist.

#### *Interviews*

Three semi-structured face-to-face qualitative interviews were conducted with two psychotherapists and a GP. The same topic guide that had been developed for the focus groups was utilised in the interviews to ensure consistency. As with the focus groups, the interviewer explored additional topics when brought up by the interviewee. Interviews were carried out by an experienced qualitative researcher (SW) and were audio recorded.

#### *Analysis*

All focus groups and interviews were transcribed verbatim. Transcripts were read and re-read by SW both during and after the data collection period. While the focus groups and interviews were taking place, the REDUCE Study team met regularly to discuss topics raised by participants and the topic guide was refined as the focus groups and interviews progressed through debriefing with the two facilitators and through meetings with the wider research team. These discussions resulted in only minor changes regarding the order and wording of questions.



1

2 A thematic analysis approach was used to analyse data drawing on methods of constant  
3 comparison [26–29]. SW independently coded the seven transcripts using Nvivo, and a  
4 secondary analysis team (SW, AG, HB, GL and TK) met to agree a preliminary coding  
5 frame, which was then agreed by the whole team. HB independently coded two transcripts  
6 using the coding frame; discrepancies were minor and changes were made following  
7 discussion with the team. Codes were grouped into themes by SW and HB, where both  
8 within and between-participant variation was considered. Theme labelling and interpretation  
9 was continually discussed in regular team meetings. Data were assessed for saturation by  
10 SW individually and across-group (Onwuegbuzie et al., 2009). Data saturation was  
11 determined when no new codes were emerging.

12

## 13 Results

14 Five themes were identified from the data analysis regarding barriers and facilitators to  
15 discussing antidepressant discontinuation with patients (see figure 1).

16

17 [insert figure 1 about here]

18

### 19 Theme 1: Who is responsible for broaching the subject of discontinuation?

20 There were differing views about who is responsible for raising the topic of discontinuation in  
21 a consultation. A small number of HPs suggested it was the patient's responsibility to broach  
22 the subject and that this expectation should be set when antidepressants are first prescribed.

59

60

1  
2  
3  
4 1  
5  
6  
7 2

*I tend to say to people, 'Look, when you start it, I'd like you to continue for at least six*

8  
9 3

*months after you've felt well', and then right at the outset, I put the responsibility over*

10  
11 4

*to them and say, 'Look, one of the things about depression is that you lose control*

12  
13 5

*and the worst thing is to come to see the doctor and the doctor takes over control.*

14  
15 6

*So, as far as I'm concerned, you're in control of these tablets and it's your choice as*

16  
17 7

*to when you want to stop it but usually the recommendation is six months after you've*

18  
19 8

*been well'. I think most people - I haven't audited it - at that stage, do come back*

20  
21 9

*round about six months-ish and are keen to stop and usually that works okay.*

22  
23 10

[GP/09/0002].

24  
25  
26  
27  
28  
29 11  
30  
31

12 One GP argued in favour of telling the patient at the initial prescription that they have the

13 responsibility to initiate stopping and the choice to discontinue is up to them. By setting this

14 expectation, it opens up the possibility of them taking control by broaching the subject with

15 their GP when they are ready.

16 However HPs highlighted there are problems with relying on the patient to broach the issue.

17 Two nurses and a psychotherapist acknowledged that many patients may not instigate these

18 conversations. One psychotherapist explained that patients may be reluctant to broach the

19 subject due to expectations of how the doctor may respond, or perceiving the doctor to be

20 more knowledgeable about the situation.

21  
22  
23  
24  
25  
26  
27  
28  
29  
30  
31  
32  
33  
34  
35  
36  
37  
38  
39  
40  
41  
42  
43  
44  
45  
46  
47  
48  
49  
50  
51  
52  
53  
54  
55 21  
56  
57  
58  
59  
60

1  
2  
3  
4 1 *Even if they do get an appointment, I've met a lot of people who are really hesitant*  
5  
6 2 *about asking about changes in medication, because of the response from the doctor*  
7  
8 3 *perhaps or their perceived response... I think there's often a worry, you know, the*  
9  
10 4 *kind of, 'Doctor knows best, and they put me on this medication. So I don't want to*  
11  
12 5 *offend or I don't want to question'. [PT/14/0002].*  
13  
14  
15  
16 6

17  
18  
19 7 One GP suggested that when patients do not raise the idea of discontinuation, practitioners  
20  
21 8 may assume that the patient wants to continue treatment. This mutual assumption that the  
22  
23 9 HP wants the patient to continue, and that the patient him/herself wants to continue, may  
24  
25  
26 10 result in a form of collusion to maintain the status quo.

27  
28  
29 11 HPs appeared to be aware that relying on the patient to initiate discussion may be  
30  
31 12 problematic, as evidenced through the way some HPs discussed the problem. It may  
32  
33 13 therefore follow that the responsibility to initiate discussions around discontinuation should  
34  
35 14 lie with the GP.  
36  
37  
38  
39  
40  
41  
42

43 16 *I think I'm guilty of this, it's very easy just to keep kicking the can down the road and*  
44  
45 17 *the patient keeps taking the medication because they feel they should and you keep*  
46  
47 18 *prescribing it because you assume they still want it and there's this kind of collusion*  
48  
49 19 *that unless you actively intervene and say, 'Come and talk to me', or whatever.*  
50  
51 20 [GP/11/0001].  
52  
53  
54  
55  
56  
57  
58  
59  
60

1  
2  
3  
4 1 Some participants (including GPs) thought that it was the GP's responsibility to broach the  
5  
6 2 subject with patients; arguing that the person who prescribes the medication should be the  
7  
8 3 person to initiate discussion of discontinuation. This was especially the case if a patient has  
9  
10 4 been on the medication long-term and may not have considered stopping. However, taking a  
11  
12 5 proactive approach was not always considered feasible in practice; continuity may facilitate  
13  
14 6 discussions of antidepressant withdrawal, though it is not always possible in primary care.  
15  
16  
17  
18 7 Some of the HPs referred to the discussion of discontinuation as a shared decision process.  
19  
20  
21 8 They talked about the need to assess the patient's capacity in making decisions about  
22  
23 9 withdrawal and negotiating with the patient to come to a shared decision about whether to  
24  
25 10 discontinue. One GP also suggested it must be a shared decision as GPs are currently  
26  
27 11 unable to manage the amount of work involved due to organisational factors which make  
28  
29 12 having these conversations more challenging.  
30  
31  
32  
33  
34  
35

36 14 *We'd say that because these patients are working and living in the community and*  
37  
38 15 *are not sectioned and have capacity, that there is definitely a shared responsibility*  
39  
40 16 *with the patient because it is their medicine and their mental health that we're looking*  
41  
42 17 *after. So I'm quite happy to say it's a shared responsibility but it definitely can't be just*  
43  
44 18 *a primary care clinician's because we'll not manage to cope. [GP/19/0002].*  
45  
46  
47  
48  
49  
50

51  
52 20 The role of other HPs was also discussed with regards to conversations around  
53  
54 21 discontinuing antidepressants. Though nurses have been considered to play a role in these  
55  
56 22 discussions, there is acknowledgement that there are limitations regarding their authority  
57  
58 23 and experience in managing medications, and often patients are signposted to their GP by  
59  
60

1  
2  
3 1 their nurse. Social workers, pharmacists, care co-ordinators and psychiatrists were also  
4  
5  
6 2 mentioned as potential sources of additional support in stopping antidepressants, in some  
7  
8 3 cases.  
9

10  
11 4  
12  
13  
14 5 Theme 2: Risk of destabilising current situation  
15

16  
17 6 Some HPs described it being easier to continue prescribing rather than raising  
18  
19  
20 7 discontinuation with patients and acknowledged a need to initiate more discussions about  
21  
22 8 discontinuation with patients who may be eligible. There were concerns about instigating  
23  
24 9 discussions with patients who are currently well as they did not want to risk destabilising the  
25  
26  
27 10 current situation. It was considered less risky to continue prescribing.  
28  
29

30  
31  
32  
33 12 *I think about - not just to patients but also to healthcare professionals or GPs - to*  
34  
35 13 *reduce the medication is the concern that they might be working and reducing might*  
36  
37  
38 14 *destabilise a current stable situation, especially if the patient has been very, very*  
39  
40 15 *difficult to control in the past and hasn't got the support network perhaps.*  
41  
42 16 [GP/12/0001].  
43  
44  
45

46 17  
47  
48  
49 18 There was an assumption that patients also do not want to risk upsetting the current  
50  
51 19 situation if they are feeling well.  
52  
53

54 20  
55  
56  
57 21 *I think for a lot that are on them, there is a massive fear factor about stopping,*  
58  
59 22 *because they remember how awful they felt. They don't want to feel like that. They*  
60

1  
2  
3  
4 1 *feel well again and they just think, well, you know, I'd rather just keep the status quo.*

5  
6 2 [GP/03/0004].

7  
8  
9 3  
10  
11  
12 4  
13  
14  
15 5 Theme 3: Continuity and knowing the patient makes it easier to discuss discontinuation

16  
17  
18 6 Involvement in the initial prescription was perceived to place responsibility on the prescriber  
19  
20 7 to prompt discontinuation later, and an opportunity to discuss and set patient expectations  
21  
22 8 around withdrawal. Explaining to a patient at the initial prescription that discontinuation will  
23  
24  
25 9 be discussed at a later date was seen to be a facilitator in broaching the subject of  
26  
27 10 discontinuation.  
28  
29  
30  
31  
32

33  
34 12 *The very first consultation if you're actually selling the idea of some medication being*  
35  
36 13 *helpful, that it's for a specific time period, expecting someone to be able to be able to*  
37  
38 14 *come off it at about six months, so suggest your timescale of appointments and then*  
39  
40 15 *say, 'Oh, see you in about five months from the initiation of treatment. At that point,*  
41  
42 16 *we can actually make a plan for withdrawal and I would be planning to withdraw it*  
43  
44 17 *slowly if everything was going well in your life'. [GP/11/0004].*  
45  
46  
47  
48  
49  
50

51  
52 19 There were a number of facilitators to discussing discontinuation with patients. These  
53  
54 20 included knowledge of the patient's experience with antidepressants, their triggers for  
55  
56 21 depression, why they started their medication and how things have changed since the initial  
57  
58  
59  
60

1  
2  
3  
4 1 prescription. This again suggests that continuity is beneficial, especially in terms of reducing  
5  
6 2 risk.

7  
8  
9 3  
10  
11  
12 4 Theme 4: A HP's confidence in their skills and knowledge

13  
14  
15 5 Some of the HPs reported a lack of confidence, knowledge and skill with regards to  
16  
17 6 antidepressant discontinuation which could act as a barrier to broaching the subject of  
18  
19 7 stopping with patients. There was an awareness that discussing discontinuation with patients  
20  
21 8 is something that could be improved upon.

22  
23  
24  
25 9  
26  
27  
28 10 *As a GP, I think for GPs, I think we're very good at starting patients on it. We are*  
29  
30 11 *good at titrating the dose up. Pretty good at picking the right medications suitable for*  
31  
32 12 *the patients, because they have different side effects over spectrums. But what we're*  
33  
34 13 *probably not good enough, at the moment, is sort of the long-term managing and the*  
35  
36 14 *coming-off part. [GP/12/0001]*

37  
38  
39  
40  
41 15  
42  
43  
44 16 HPs discussed a need for more support and information for themselves as well as for  
45  
46 17 patients. They spoke about NICE guidance on antidepressant discontinuation, with many  
47  
48 18 being unfamiliar with the guidance or not using them. They described being dissatisfied and,  
49  
50 19 in one case, irritated by the current guidance. They highlighted that it is unclear (especially  
51  
52 20 regarding tapering regimes), limited, not accessible and at times not applicable to real  
53  
54 21 patients.

55  
56  
57  
58  
59 22  
60

1  
2  
3  
4 1 *I don't think there's a lot of resources out there to kind of what to say and how to do it.*

5  
6 2 *I'm sure I've looked at the guidelines before and I thought a bit pants. [NP/12/0001].*

7  
8  
9 3

10  
11  
12 4 Theme 5: Organisational barriers and enablers to discussing discontinuation

13  
14  
15 5 The above processes are shaped by the context surrounding them, with environmental work  
16  
17 6 contributing to decision making around discontinuation. Some aspects of the healthcare  
18  
19 7 system were described as further barriers to antidepressant discontinuation. A lack of  
20  
21 8 continuity was reported with patients seeing different practitioners each time, and these  
22  
23 9 practitioners were at times providing inconsistent recommendations. This may act as a  
24  
25 10 barrier to discussing discontinuation due to the perceived need to be familiar with a patient to  
26  
27 11 discuss withdrawal, and the idea that the responsibility for raising the topic of discontinuation  
28  
29 12 lies with the HP who initially prescribed the antidepressant.  
30  
31  
32  
33  
34  
35 13 HPs repeatedly noted the challenge of time constraints in practice and how this is often a  
36  
37 14 barrier to both initiating and managing discontinuation due to ten minute consultations not  
38  
39 15 being long enough, and not having the time for review appointments.  
40  
41  
42  
43  
44

45  
46 17 *things are ticking along relatively okay, you know it's not going to be necessarily a*  
47  
48 18 *straightforward consultation and it might be time consuming, it might delay you and*  
49  
50 19 *you haven't got enough appointments anyway and da, da, da, da, you can see how*  
51  
52 20 *that, as a clinician, restrains you from perhaps rocking the boat. [GP/11/0002].*  
53  
54  
55

56 21  
57  
58  
59  
60



1  
2  
3  
4 1 HPs also mentioned the role of computer systems, explaining that patients can get lost in the  
5  
6 2 system and that systems which adequately prompt medication reviews would be useful in  
7  
8 3 broaching discontinuation with patients.  
9

## 10 11 4 12 13 14 5 **Discussion**

15  
16  
17 6 In this paper we explored HP perspectives on discontinuing long-term antidepressants in  
18  
19 7 primary care. Five themes were identified and covered who is responsible for broaching the  
20  
21 8 subject of discontinuation, how fear of relapse can dissuade HPs from discontinuing,  
22  
23 9 familiarity with the patient as enabling conversations around withdrawal, the lack of  
24  
25 10 information and support for HPs, and organisational barriers and enablers. With regards to  
26  
27 11 NPT [24], there is relational work that goes into negotiating responsibility and shared  
28  
29 12 decision-making about antidepressant discontinuation. This relational work is founded on  
30  
31 13 familiarity with the patient and knowledge of their experiences with depression and  
32  
33 14 antidepressants. There is process work that goes into intervening, managing the  
34  
35 15 consequences of withdrawal and avoiding destabilisation of a patient during and following  
36  
37 16 discontinuation. This is founded on enacting generalisable clinical knowledge and practice  
38  
39 17 with confidence. These processes are then shaped by contextual mechanisms and there is  
40  
41 18 environmental work that goes into negotiating the decision to discontinue antidepressants.  
42  
43  
44  
45

46  
47  
48  
49 19 An important theme identified in the current paper is contention in terms of who is  
50  
51 20 responsible for broaching the topic of discontinuation. While the majority of HPs  
52  
53 21 acknowledged that the responsibility may lie with the GP or be a shared decision with  
54  
55 22 patients, they indicated that they currently do not initiate these conversations as much as  
56  
57 23 they feel they ought to. There is limited evidence of this in previous research with one study  
58  
59  
60

1  
2  
3  
4 1 reporting that some GPs expect patients to contact their practitioner when they wish to make  
5  
6 2 changes to or discontinue their antidepressant [19].  
7  
8

9 3 The shift in recent decades in primary care towards expert patients and self-care relies on an  
10  
11 4 expectation of agency on behalf of the patient [30]. However depression and the long-term  
12  
13 5 use of antidepressants are associated with reduced agency [31]. GPs appear to be aware  
14  
15 6 that there are barriers for patients in initiating conversations about withdrawal. The logical  
16  
17 7 implication of this would be that GPs take the responsibility for initiating these conversations.  
18  
19 8 However, despite GPs' awareness of the need to improve on the current situation, these  
20  
21 9 conversations about discontinuation are often not routinely being initiated.  
22  
23  
24

25  
26 10 GPs in the current study discussed a tension between being more proactive in their role and  
27  
28 11 their full workload, which limits opportunities to demarcate time for focused discussion about  
29  
30 12 discontinuation. Among the factors enabling discussion about discontinuation were knowing  
31  
32 13 the patient and continuity of care. However, in current UK primary care, patients do not  
33  
34 14 always see the same GP and GPs therefore may be unable to build the desired relationship  
35  
36 15 with or acquire the desired knowledge of a patient before broaching the subject of stopping  
37  
38 16 antidepressants. The way primary care often operates therefore does not lend itself to the  
39  
40 17 desired context for discussing withdrawal, which results in a bias towards inaction. One  
41  
42 18 implication is that familiarisation with the patient's situation should be achieved through  
43  
44 19 medical notes and discussion with the patient. However, time constraints may mean that  
45  
46 20 consultations are not long enough to gather the desired information before discussing  
47  
48 21 withdrawal. If it were agreed that initial discussions should be triggered by the GP, this would  
49  
50 22 bring clarity to the currently uncertain system. With a more clearly articulated plan, GPs may  
51  
52 23 be better able to arrange appointments (perhaps double appointments where necessary) to  
53  
54 24 discuss discontinuation.  
55  
56  
57  
58  
59  
60

1  
2  
3  
4 1 HPs reported fear of destabilising currently well patients by discontinuing antidepressants; a  
5  
6 2 fear which has been evidenced in patients and GPs [19,20,32]. This emphasis on avoiding  
7  
8 3 negative outcomes over focusing on the longer-term benefits of discontinuation may result in  
9  
10 4 a preference for deferring discussions of withdrawal. However when comparing  
11  
12 5 antidepressant maintenance treatment to tapering with psychological support, long-term  
13  
14 6 relapse rates for depression are comparable [33–35] or in some cases lower for patients  
15  
16 7 receiving psychological therapy [36,37]. It may therefore be useful to reassure HPs that the  
17  
18 8 risk of relapse may be minimised if discontinuation is accompanied by appropriate  
19  
20 9 psychological support (though there is still a need for further work on providing support for  
21  
22 10 patients who are discontinuing antidepressants) [33,37,38].

23  
24  
25  
26  
27  
28 11 HPs report dissatisfaction with the current guidelines and acknowledge gaps in their own  
29  
30 12 knowledge regarding antidepressant withdrawal. One other study has highlighted that GPs  
31  
32 13 feel guidelines could provide more specific information about antidepressant treatment and  
33  
34 14 discontinuation [19]. This suggests a need to provide improved guidance and enhanced  
35  
36 15 accessibility to and awareness of guidance on discontinuation, including specific guidance  
37  
38 16 on reducing the doses of different antidepressants. This may increase HP confidence in their  
39  
40 17 ability to support patients through discontinuation. This increased confidence in the HP  
41  
42 18 ability to manage discontinuation may then also help to lessen the HP's fears around  
43  
44 19 destabilisation and relapse.

45  
46  
47  
48  
49  
50 20

## 51 52 53 21 **Strengths and Limitations**

54  
55  
56 22 This study is the first to explore HP perspectives of antidepressant discontinuation in UK  
57  
58 23 primary care, with its larger sample consisting of a range of HP roles (including GPs, GP  
59  
60

1  
2  
3  
4 1 assistants, nurses, community mental health team workers and psychotherapists) which  
5  
6 2 were lacking in previous research [e.g. 20,21,32,39,40], and data reached saturation. GPs  
7  
8 3 were the largest group among our interviewees, compared to the other professionals, which  
9  
10 4 aligns with the current prescribing activity with the large majority of long-term  
11  
12  
13 5 antidepressants prescribed and monitored by GPs. This fits with our finding that GPs are  
14  
15 6 often considered responsible for initiating conversations around withdrawal. However we  
16  
17  
18 7 also identified that there are a number of professionals who may be involved in  
19  
20 8 discontinuation (e.g. pharmacists, social workers and care co-ordinators) and further  
21  
22  
23 9 research may be needed to explore these perspectives. For example, none of the practices  
24  
25 10 in the current study managed discontinuation using practice pharmacists, who may play an  
26  
27  
28 11 important role in antidepressant withdrawal. In particular, it may be of interest to explore  
29  
30 12 differences between professions.

31  
32  
33 13 The use of focus groups facilitated discussion and provided candid responses from  
34  
35 14 participants. However it is possible for discussions to become polarised or influenced by  
36  
37  
38 15 dominant members of the group. For example, in a focus group of nine GPs, there were two  
39  
40 16 more dominant members and two members who spoke less frequently. As such, some  
41  
42  
43 17 participants' views may be less well represented in a group setting. Giving participants an  
44  
45 18 opportunity to provide feedback on the study's findings might have helped provide greater  
46  
47  
48 19 representation.

49  
50 20

## 51 52 53 21 **Conclusion**

54  
55  
56 22 Previous research has highlighted time constraints and fear of relapse as barriers to GPs  
57  
58  
59 23 discontinuing antidepressants and one previous study found that some GPs expected  
60

1 patients to initiate discussions of discontinuation. The current study has explored these  
2 barriers in detail in UK primary care health professionals and highlighted additional factors  
3 influencing decisions around discontinuation such as organisational barriers, a need for  
4 clearer guidance as well as a desire to know the patient well. Our findings highlight a need to  
5 support HPs in antidepressant discontinuation in terms of providing specific information and  
6 guidance on how to discontinue antidepressants. They also suggest HPs would benefit from  
7 support and guidance around fears of patient relapse and awareness of the need to initiate  
8 discussions about discontinuation. These findings have informed intervention development  
9 within the REDUCE programme. Future research is needed to explore ways in which HPs  
10 can be supported in managing antidepressant discontinuation in primary care and in a way  
11 that is acceptable and effective for patients.

## 1 **Acknowledgements**

2 The authors would like to take this opportunity to thank all contributors, collaborators and  
3 team members of the REDUCE programme, including our Patient and Public Involvement  
4 (PPI) representatives, Bryan Palmer, Susan Collins and Margaret Bell.

## 6 **Funding**

7 This report is independent research funded by the National Institute for Health Research  
8 (Programme Grants for Applied Research, REDUCE RP-PG-1214-20004). The views  
9 expressed in this publication are those of the author(s) and not necessarily those of the  
10 NHS, the National Institute for Health Research or the Department of Health.

## 12 **Data Sharing**

13 This is a qualitative study and therefore the data is not suitable for sharing beyond what is  
14 contained within the report. Further information can be requested from the corresponding  
15 author.

## 17 **Competing Interests**

18 None to declare.

## 20 **Author Contributions**

21 HB is a research fellow working on the REDUCE programme and contributed toward  
22 analysis and second coding of data, and the writing of this paper. SW is the qualitative  
23 researcher currently working on the REDUCE programme and led the research, data  
24 collection, analysis and contributed to the writing of this paper. AG and GL are co-applicants

1  
2  
3  
4 1 on the REDUCE programme and contributed towards the analysis. WOB is the Programme  
5  
6 2 Manager on the REDUCE programme, had oversight of the research and data collection. TK  
7  
8 3 is the Chief Investigator of the research thereby leading on the programme and contributed  
9  
10 4 towards analysis and interpretation of data. All co-authors (HB, SW, AG, GL, CM, EM, WOB  
11  
12 5 and TK) have substantially contributed to the writing of this article, provided critical revision  
13  
14 6 and gave final approval of the published version. All authors agree to be accountable for all  
15  
16 7 aspects of the work in ensuring that questions related to the accuracy or integrity of any part  
17  
18 8 of the work are appropriately investigated and resolved.  
19  
20  
21  
22  
23  
24  
25  
26  
27  
28  
29  
30  
31  
32  
33  
34  
35  
36  
37  
38  
39  
40  
41  
42  
43  
44  
45  
46  
47  
48  
49  
50  
51  
52  
53  
54  
55  
56  
57  
58  
59  
60

1  
2  
3  
4 1 **References**

- 5  
6 2 1 Kendrick T, Stuart B, Newell C, *et al.* Did NICE guidelines and the Quality Outcomes  
7 3 Framework change GP antidepressant prescribing in England? Observational study  
8 4 with time trend analyses 2003–2013. *J Affect Disord* 2015;**186**:171–7.  
9 5 doi:10.1016/j.jad.2015.06.052
- 10  
11  
12  
13 6 2 Moore M, Yuen HM, Dunn N, *et al.* Explaining the rise in antidepressant prescribing: a  
14 7 descriptive study using the general practice research database. *BMJ* 2009;**339**:b3999.  
15 8 doi:10.1136/BMJ.B3999
- 16  
17  
18 9 3 Johnson CF, Macdonald HJ, Atkinson P, *et al.* Reviewing long-term antidepressants  
19 10 can reduce drug burden: A prospective observational cohort study. *Br J Gen Pract*  
20 11 2012;**62**:773–9. doi:10.3399/bjgp12X658304
- 21  
22  
23  
24 12 4 Petty DR, House A, Knapp P, *et al.* Prevalence, duration and indications for  
25 13 prescribing of antidepressants in primary care. *Age Ageing* 2006;**35**:523–6.  
26 14 doi:10.1093/ageing/af023
- 27  
28  
29 15 5 Scholes S, Faulding S, Mindell J. Use of prescribed medicines. 2014. 1–27.
- 30  
31 16 6 Ambresin G, Palmer V, Densley K, *et al.* What factors influence long-term  
32 17 antidepressant use in primary care? Findings from the Australian diamond cohort  
33 18 study. *J Affect Disord* 2015;**176**:125–32. doi:10.1016/j.jad.2015.01.055
- 34  
35  
36  
37 19 7 Cruickshank G, MacGillivray S, Bruce D, *et al.* Cross-sectional survey of patients in  
38 20 receipt of long-term repeat prescriptions for antidepressant drugs in primary care.  
39 21 *Ment Health Fam Med* 2008;**5**:105–9.
- 40  
41  
42 22 8 Piek E, Kollen BJ, van der Meer K, *et al.* Maintenance Use of Antidepressants in  
43 23 Dutch General Practice: Non-Guideline Concordant. *PLoS One* 2014;**9**:e97463.  
44 24 doi:10.1371/journal.pone.0097463
- 45  
46  
47  
48 25 9 Middleton D, Cameron I, Reid I. Continuity and monitoring of antidepressant therapy  
49 26 in a primary care setting. *Qual Prim Care* 2011;**19**:109–13.
- 50  
51  
52 27 10 Sinclair JE, Aucott LS, Lawton K, *et al.* The monitoring of longer term prescriptions of  
53 28 antidepressants: Observational study in a primary care setting. *Fam Pract*  
54 29 2014;**31**:419–26. doi:10.1093/fampra/cm019
- 55  
56  
57 30 11 Ferguson JM. SSRI Antidepressant Medications: Adverse Effects and Tolerability.  
58 31 *Prim Care Companion J Clin Psychiatry* 2001;**3**:22–7. doi:10.4088/PCC.v03n0105
- 59  
60



- 1  
2  
3  
4 1 12 Coupland C, Dhiman P, Morriss R, *et al.* Antidepressant use and risk of adverse  
5 2 outcomes in older people: population based cohort study. *Bmj* 2011;**343**:d4551–  
6 3 d4551. doi:10.1136/bmj.d4551  
7  
8  
9 4 13 Goodwin GM, Price J, De Bodinat C, *et al.* Emotional blunting with antidepressant  
10 5 treatments: A survey among depressed patients. *J Affect Disord* 2017;**221**:31–5.  
11 6 doi:10.1016/j.jad.2017.05.048  
12  
13  
14 7 14 Ilyas S, Moncrieff J. Trends in prescriptions and costs of drugs for mental disorders in  
15 8 England, 1998–2010. *Br J Psychiatry* 2012;**200**:393–8.  
16 9 doi:10.1192/bjp.bp.111.104257  
17  
18  
19  
20 10 15 Health and Social Care Information Centre. Improving Access to Psychological  
21 11 Therapies Report, April 2015 Final and Quarter 4 2014/15. 2015.  
22 12 <http://www.hscic.gov.uk/catalogue/PUB17880>  
23  
24  
25 13 16 Health and Social Care Information Centre. Prescriptions Dispensed in the  
26 14 Community - Statistics for England, 2006-2016 - NHS Digital.  
27 15 2017.[https://digital.nhs.uk/data-and-information/publications/statistical/prescriptions-](https://digital.nhs.uk/data-and-information/publications/statistical/prescriptions-dispensed-in-the-community/prescriptions-dispensed-in-the-community-statistics-for-england-2006-2016-pas)  
28 16 [dispensed-in-the-community/prescriptions-dispensed-in-the-community-statistics-for-](https://digital.nhs.uk/data-and-information/publications/statistical/prescriptions-dispensed-in-the-community/prescriptions-dispensed-in-the-community-statistics-for-england-2006-2016-pas)  
29 17 [england-2006-2016-pas](https://digital.nhs.uk/data-and-information/publications/statistical/prescriptions-dispensed-in-the-community/prescriptions-dispensed-in-the-community-statistics-for-england-2006-2016-pas) (accessed 2 Jul 2018).  
30  
31  
32  
33  
34 18 17 Independent Research Service of the House of Commons Library. No Title.  
35 19 2008.<http://researchbriefings.parliament.uk/%0AJohnson%0A>  
36  
37  
38 20 18 Eveleigh R, Grutters J, Muskens E, *et al.* Cost-utility analysis of a treatment advice to  
39 21 discontinue inappropriate long-term antidepressant use in primary care. *Fam Pract*  
40 22 2014;**31**:578–84. doi:10.1093/fampra/cmu043  
41  
42  
43 23 19 Bosman RC, Huijbregts KM, Verhaak PFM, *et al.* Long-term antidepressant use: A  
44 24 qualitative study on perspectives of patients and GPs in primary care. *Br J Gen Pract*  
45 25 2016;**66**:e708–19. doi:10.3399/bjgp16X686641  
46  
47  
48  
49 26 20 Johnson CF, Williams B, Macgillivray SA, *et al.* 'Doing the right thing': Factors  
50 27 influencing GP prescribing of antidepressants and prescribed doses. *BMC Fam Pract*  
51 28 2017;**18**:1–13. doi:10.1186/s12875-017-0643-z  
52  
53  
54 29 21 Davies J, Read J. A systematic review into the incidence, severity and duration of  
55 30 antidepressant withdrawal effects: Are guidelines evidence-based? *Addict Behav*  
56 31 Published Online First: 4 September 2018. doi:10.1016/J.ADDBEH.2018.08.027  
57  
58  
59 32 22 Maund E, Ryves R, Williams S, *et al.* Barriers and facilitators to discontinuing

- 1  
2  
3  
4 1 antidepressant use: a systematic review and thematic synthesis. *Manuscr Submitt*  
5 2 *Publ* 2018.  
6  
7 3 23 REDUCE (REviewing long term anti-Depressant Use by Careful monitoring in  
8 4 Everyday practice).  
9 5 2016.[https://www.southampton.ac.uk/medicine/academic\\_units/projects/reduce.page](https://www.southampton.ac.uk/medicine/academic_units/projects/reduce.page)  
10 6 (accessed 29 Jun 2018).  
11  
12  
13  
14 7 24 May C, Finch T. Implementing, embedding, and integrating practices: An outline of  
15 8 normalization process theory. *Sociology* 2009;**43**:535–54.  
16 9 doi:10.1177/0038038509103208  
17  
18  
19  
20 10 25 Asbury J-E. Overview of Focus Group Research. *Qual Health Res* 1995;**5**:414–20.  
21 11 doi:10.1177/104973239500500402  
22  
23  
24 12 26 Braun V, Clarke V. Using thematic analysis in psychology. *Qual Res Psychol*  
25 13 2006;**3**:77–101. doi:10.1191/1478088706qp063oa  
26  
27  
28 14 27 Glaser BG. *Theoretical Sensitivity*. Mill Valley, C.A.: : Sociology Press 1978.  
29  
30 15 28 Glaser BG. *Discovery of Grounded Theory*. Chicago: : Aldine 1992.  
31  
32 16 29 Glaser BG, Strauss AL. *The discovery of grounded theory: Strategies for qualitative*  
33 17 *research*. Chicago: : Aldine 1967.  
34  
35  
36 18 30 Department of H. The Expert Patient: A New Approach to Chronic Disease  
37 19 Management for the 21st Century. 2001.  
38 20 [http://webarchive.nationalarchives.gov.uk/20120511062115/http://www.dh.gov.uk/prod\\_consum\\_dh/groups/dh\\_digitalassets/@dh/@en/documents/digitalasset/dh\\_4018578](http://webarchive.nationalarchives.gov.uk/20120511062115/http://www.dh.gov.uk/prod_consum_dh/groups/dh_digitalassets/@dh/@en/documents/digitalasset/dh_4018578.pdf)  
39 21 [.pdf](http://webarchive.nationalarchives.gov.uk/20120511062115/http://www.dh.gov.uk/prod_consum_dh/groups/dh_digitalassets/@dh/@en/documents/digitalasset/dh_4018578.pdf) (accessed 29 Jun 2018).  
40 22  
41  
42  
43  
44 23 31 Cartwright C, Gibson K, Read J. Personal agency in women's recovery from  
45 24 depression: The impact of antidepressants and women's personal efforts. *Clin*  
46 25 *Psychol* 2018;**22**:72–82. doi:10.1111/cp.12093  
47  
48  
49  
50 26 32 Dickinson R, Knapp P, House AO, *et al*. Long-term prescribing of antidepressants in  
51 27 the older population: A qualitative study. *Br J Gen Pract* 2010;**60**:257–9.  
52 28 doi:10.3399/bjgp10X483913  
53  
54  
55 29 33 Kuyken W, Hayes R, Barrett B, *et al*. Effectiveness and cost-effectiveness of  
56 30 mindfulness-based cognitive therapy compared with maintenance antidepressant  
57 31 treatment in the prevention of depressive relapse or recurrence (PREVENT): a  
58  
59  
60

- 1  
2  
3  
4 1 randomised controlled trial. *Lancet* 2015;**386**:63–73. doi:10.1016/S0140-  
5 2 6736(14)62222-4  
6  
7 3 34 Kuyken W, Byford S, Watkins E, *et al.* Mindfulness-Based Cognitive Therapy to  
8 4 Prevent Relapse in Recurrent Depression. *J Consult Clin Psychol* 2008;**76**:966–78.  
9 5 doi:10.1037/a0013786  
10  
11  
12 6 35 Bockting CLH, ten Doesschae MC, Spijker J, *et al.* Continuation and maintenance use  
13 7 of antidepressants in recurrent depression. *Psychother psychomatics* 2008;**77**:17–26.  
14  
15  
16 8 36 Fava GA, Gandhi S, Zielezny M, *et al.* Cognitive behavioral treatment of residual  
17 9 symptoms in primary major depressive disorder. *Am J Psychiatry* 1994;**151**:1295–9.  
18 10 doi:10.1176/ajp.151.9.1295  
19  
20  
21  
22 11 37 Fava GA, Rafanelli C, Grandi S, *et al.* Prevention of Recurrent Depression With  
23 12 Cognitive Behavioral Therapy. *Arch Gen Psychiatry* 1998;**55**:816–20.  
24  
25  
26 13 38 Huijbers MJ, Spijker J, Donders ART, *et al.* Preventing relapse in recurrent  
27 14 depression using mindfulness-based cognitive therapy, antidepressant medication or  
28 15 the combination: trial design and protocol of the MOMENT study. *BMC Psychiatry*  
29 16 2012;**12**:125. doi:10.1186/1471-244X-12-125  
30  
31  
32  
33 17 39 Iden KR, Hjörleifsson S, Ruths S. Treatment decisions on antidepressants in nursing  
34 18 homes: A qualitative study. *Scand J Prim Health Care* 2011;**29**:252–6.  
35 19 doi:10.3109/02813432.2011.628240  
36  
37  
38 20 40 Pollock K, Grime J. Primary care practice consultations for depression : qualitative  
39 21 study. *Prim Care* 2002;**325**:687–90.  
40  
41  
42  
43  
44  
45 23  
46  
47  
48  
49  
50  
51  
52  
53  
54  
55  
56  
57  
58  
59  
60

1  
2  
3  
4  
5  
6  
7  
8  
9  
10  
11  
12  
13  
14  
15  
16  
17  
18  
19  
20  
21  
22  
23  
24  
25  
26  
27  
28  
29  
30  
31  
32  
33  
34  
35  
36  
37  
38  
39  
40  
41  
42  
43  
44  
45  
46  
47  
48  
49  
50  
51  
52  
53  
54  
55  
56  
57  
58  
59  
60

1 **Figure legend**

2 Figure 1. Diagram of the relationships between themes.

For peer review only



Figure 1. Diagram of the relationships between themes

270x141mm (300 x 300 DPI)

**REDUCE Study Workstream 2: REviewing long-term anti-Depressant treatment Use by Careful monitoring in Everyday practice**

**TOPIC GUIDE FOR PRACTITIONER FOCUS GROUPS**

**Introduction**

1. **Welcome** and thank you for volunteering to take part in this focus group. You have been asked to participate as your point of view is important. I realize you are busy and I appreciate your time. Name and role on study.
2. **Introduction:** This focus group discussion is designed to assess your current views and experiences with patients withdrawing from long-term antidepressants, why they might wish to withdraw, and why withdrawal might be difficult. The aim is to develop new ways of helping people withdraw from treatment, taking into account the difficulties they might face.
3. **By way of reminder:**
  - Check participants are still willing to take part, notes that observers are present, and will be audio recorded.
  - Remind them it will take approximately 60 minutes.
  - Their responses will be kept confidential, and quotes used will not identify them.
  - They can change their mind about taking part in the study and stop at any point.
4. **Rules of engagement in focus groups:**
  - To speak one at a time, and allow others to finish their point.
  - To respect each other's point of view, whilst disagreeing if they wish.
  - To be honest even when their responses may not be in agreement with the group.
  - That responses made by all participants be kept confidential – what is said here stays here.
  - The study is to ask them about their experiences and views of helping patients to stop taking antidepressants. Therefore there are no right or wrong answers as it is their views that are important to us.
5. **Ask if the participants have any questions.**
6. **Start recording.**

**WARM UP**

*Firstly, I'd like everyone to introduce themselves. Please could you tell us your name, job role and where you're based?*

## Topic 1: Long-term antidepressant use and knowing when discontinuation may be appropriate

- 1  
2  
3  
4  
5
1. I would like to invite you to share any clinical experiences you have of discontinuing antidepressants with a patient.

6 Prompts:

- 7 - Explain what happened and why?  
8 - What is your current clinical practice for discontinuation?  
9 - What problems have you encountered when discontinuing antidepressants?  
10 - What have you found to help patients to discontinue their antidepressants?  
11

- 12  
13  
14
2. What factors would you look for that indicate a patient is appropriate to discontinue from long-term antidepressants?

15 Prompts:

- 16  
17 a. Examples: Recovery, patient request, risk of side effects, potential benefits of discontinuation.  
18 b. What impact might user experiences have on decision to discontinue ADs?  
19 c. How do you come to the decision to stop a patients antidepressants?  
20  
21  
22  
23
3. Can you think of any practical considerations that may occur when considering antidepressant discontinuation?

24 Prompts:

- 25 - How quickly do you taper antidepressants (if done)?  
26 - Lack of dosage forms available to facilitate tapering.  
27 - How solve these issues.  
28  
29  
30  
31
4. What are your thoughts on current guideline recommendations for long-term antidepressant use?

32 Prompts:

- 33 - What are your thoughts on the current NICE guidelines?  
34 - How easy are the guidelines to follow?  
35 - What questions do the guidelines leave you with?  
36 - Any thoughts on presentation?  
37

38 *Hand out copies of current NICE Guidelines.*

## Topic 2: Negotiating the decision to discontinue antidepressants with patients.

- 40  
41  
42  
43  
44
5. How do you negotiate discontinuation of antidepressant medication with a patient?

45 Prompts:

- 46 - Whose decision is it in the end (to stop)?  
47 - At what point is the discussion usually initiated?  
48 - How do you feel about broaching the subject of discontinuation? How much do you push for people to  
49 withdraw? Perception of risk vs patient's wishes?  
50

- 51  
52  
53
6. What is your involvement in discontinuing antidepressants with a patient?

54 Prompts:

- 55 - Can you explain why you might not get involved?  
56 - What process do you follow if this topic is brought up by a patient?  
57 - Have you ever discussed discontinuation of antidepressants with a patient?  
58 - What would you like your involvement to be in the future?  
59  
60

## CHECK FOR COMMENTS / QUESTIONS WITH CO-FACILITATOR

**Topic 3: Role as a GP/NP/PCMHW in terms of supporting/negotiating appropriateness of discontinuation**7. What do you see as your role in negotiating medication discontinuation?

*Invite to draw on real life clinical examples and ask to explain what happened.*

## Prompts:

- How typically do you view your role in the stopping process from deciding to stop through to stopping (or not)?
- Role of other HPs in dealing with medication discontinuation – GP, NP, Therapist, pharmacist, psychiatrist, etc.
- Relationships between practitioners?

**Topic 4: How to optimise discussions about possible discontinuation with patients**8. Can you think of ways to improve discussions about possible discontinuation with patients?

## Prompts:

- Usefulness of verbal / written advice to aid discontinuation.
- Role of support networks and ways of bringing others into the process where appropriate? Uses (e.g. decision making tools, source of social support, support /challenge /resistance to medical decision)? Challenges around introducing?
- How would you evaluate and monitor discontinuation (e.g. evaluate success)?

**Topic 5: Ways to optimise implementation of a discontinuation intervention in routine practice**9. What would you like to see in an intervention to help people stop antidepressants?

## Prompts:

- Supportive needs of patients / practitioners?
- Content / mode of delivery?
- Help from other team members?
- Help from outside the practice?
- How would you like to interact with the intervention?
- Would you like to see anyone else interacting with the intervention?
- What do you see as the role of a GP/NP/PCMHW as part of the intervention?
- **PCMHWs/NPs only:** How would you view the role of providing telephone support? In principle, if trained and paid to work on this for the study (as opposed to long-term) would this be something you'd be interested in / feel able to do?

10. What would an intervention to support treatment discontinuation look like in practice?

## Prompts:

- Organisational issues, e.g. GP prescription systems.
- Who would drive the use of the intervention forward in your practice / CCG / professional body?
- How would you maintain use of an intervention over time?
- What would encourage you to use it?

***Anything wish to raise that hasn't been discussed?***

***Any questions?***

***Moderator to check with observer for any further questions, then close focus group.***



---

**Debrief:**

- Tell participants audio recorder is now being switched off.
- Thank participants for taking part in the focus group; excellent discussion.
- Revisit consent and reply slip.
- Ask if the participants have any questions / offer opportunity to discuss further following focus group.
- Let participants know will be sending summary of results at the end of the study.
- Distribute travel claims and inform invoices will be sent to practice ASAP.
- Thank participants again for taking part.

For peer review only
